# Supplementary material for: Donor–acceptor type co-crystals of arylthio-substituted tetrathiafulvalenes and fullerenes
Source: publisher site journal article supplement (doi:10.3762/bjoc.11.117), 2015-06-19
Supplement: Additional file 1 [file 1860-5397-11-117-S1.pdf]

# **Supporting Information**

## **for**

### **Donor–acceptor type co-crystals of arylthio-substituted tetrathiafulvalenes and fullerenes**

Xiaofeng Lu, Jibin Sun, Shangxi Zhang, Longfei Ma, Lei Liu, Hui Qi, Yongliang Shao, and  
Xiangfeng Shao\*

Address: State Key Laboratory of Applied Organic Chemistry, Lanzhou University, Tianshui  
Southern Road 222, Lanzhou 730000, Gansu Province, P. R. China.

Email: Xiangfeng Shao - shaoxf@lzu.edu.cn

\* Corresponding author

## Experimental

Chlorobenzene (PhCl) and carbon disulfide (CS<sub>2</sub>) were distilled over P<sub>2</sub>O<sub>5</sub> under inert conditions and stored in a long-necked flask under an argon atmosphere. **1–8** were prepared according to a method reported in the literature [1–3] and further purified by recrystallization from CH<sub>2</sub>Cl<sub>2</sub>/*n*-hexane to give red crystalline samples. C<sub>60</sub> and C<sub>70</sub> were purchased from NiChem Fine Technology Co. Ltd (Taiwan) and further purified by recrystallization from toluene.

The samples for the crystallographic analyses of the complexes were obtained by slow evaporation of the solvent. **1**•(C<sub>60</sub>)<sub>2</sub>•(CS<sub>2</sub>)<sub>2</sub> was selected as an example. It was prepared by slow evaporation of the mixed solution of **1** (12.8 mg, 2 × 10<sup>-5</sup> mol) and C<sub>60</sub> (5.7 mg, 1 × 10<sup>-5</sup> mol) in CS<sub>2</sub> (7 ml) at room temperature (RT). After 15 days, the black block single crystals were formed. The complex was collected by suction, washed with a mixture of CH<sub>2</sub>Cl<sub>2</sub>/petroleum ether, then dried in vacuo (7.3 mg were obtained).

The X-ray diffraction measurements was carried out on SuperNova (Agilent) type diffractometer. The crystal structures of complexes were solved by a direct methods *SIR2004* [4] and refined by the full-matrix least-squares method on *F*<sup>2</sup> by means of *SHELXL-97* [5]. The calculated positions of the hydrogen atoms were included in the final refinement. The crystallographic data are summarized in Table S1 and Table S2. The absorption spectra were measured in solid state by dispersing the complexes in a KBr pellet, respectively. Fourier transform infrared (FT-IR) spectra (400–4000 cm<sup>-1</sup>) were recorded on a Thermo Electron Corporation Nicolet Nexus 670 FT-IR Spectrometer with a resolution of 4 cm<sup>-1</sup>. The experimental PXRD patterns were collected at 25 °C on a X'Pert PRO (PANalytical) X-ray diffractometer using CuK $\alpha$ -radiation ( $\lambda$  = 1.5418 Å) with the generator settings 40 kV and 40 mA. Thermogravimetric analyses (TGA) were conducted on 1090B type thermal analyzer (Dupont Engineering Polymers).

**Table S1:** Selected crystallographic data for the type I co-crystals.

|                                               | <b>7•C<sub>60</sub></b>                                       | <b>8•C<sub>60</sub></b>                                        | <b>1•C<sub>70</sub></b>                         | <b>5•C<sub>70</sub></b>                                       |
|-----------------------------------------------|---------------------------------------------------------------|----------------------------------------------------------------|-------------------------------------------------|---------------------------------------------------------------|
| CCDC number                                   |                                                               |                                                                |                                                 |                                                               |
| Empirical formula                             | C <sub>88</sub> H <sub>18</sub> N <sub>2</sub> S <sub>8</sub> | C <sub>84</sub> H <sub>12</sub> N <sub>2</sub> S <sub>10</sub> | C <sub>100</sub> H <sub>20</sub> S <sub>8</sub> | C <sub>96</sub> H <sub>16</sub> N <sub>4</sub> S <sub>8</sub> |
| Formula weight                                | 1359.52                                                       | 1369.56                                                        | 1478.65                                         | 1481.61                                                       |
| Temperature / K                               | 136(2)                                                        | 107(10)                                                        | 150(1)                                          | 110(14)                                                       |
| $\lambda$ / Å                                 | 0.71073                                                       | 0.71073                                                        | 1.54184                                         | 1.54184                                                       |
| Crystal size / mm <sup>3</sup>                | 0.08×0.12×0.18                                                | 0.24×0.28×0.35                                                 | 0.01×0.15×0.17                                  | 0.05×0.06×0.11                                                |
| Crystal system                                | Triclinic                                                     | Triclinic                                                      | Triclinic                                       | Triclinic                                                     |
| space group                                   | <i>P</i> -1                                                   | <i>P</i> -1                                                    | <i>P</i> 1                                      | <i>P</i> -1                                                   |
| <i>a</i> / Å                                  | 10.3135(4)                                                    | 10.1099(9)                                                     | 10.3115(7)                                      | 13.3996(6)                                                    |
| <i>b</i> / Å                                  | 10.3164(6)                                                    | 10.6008(11)                                                    | 10.6597(7)                                      | 14.3549(7)                                                    |
| <i>c</i> / Å                                  | 13.7643(11)                                                   | 13.3530(17)                                                    | 14.2727(14)                                     | 15.9348(8)                                                    |
| $\alpha$ / °                                  | 68.271(7)                                                     | 67.122(11)                                                     | 68.533(8)                                       | 71.206(4)                                                     |
| $\beta$ / °                                   | 86.126(5)                                                     | 82.300(9)                                                      | 88.990(7)                                       | 87.261(4)                                                     |
| $\gamma$ / °                                  | 79.343(15)                                                    | 79.207(8)                                                      | 80.494(6)                                       | 77.386(4)                                                     |
| <i>V</i> / Å <sup>3</sup>                     | 1336.98(15)                                                   | 1292.2(3)                                                      | 1438.4(2)                                       | 2830.8(2)                                                     |
| <i>Z</i>                                      | 1                                                             | 1                                                              | 1                                               | 2                                                             |
| <i>d</i> <sub>calc</sub> / g cm <sup>-3</sup> | 1.689                                                         | 1.760                                                          | 1.707                                           | 1.738                                                         |
| $\mu$ / mm <sup>-1</sup>                      | 0.398                                                         | 0.490                                                          | 3.39                                            | 3.469                                                         |
| $2\theta_{\max}$ / °                          | 55.82                                                         | 57.27                                                          | 155.79                                          | 140.12                                                        |
| Data / restraints / parameters                | 4832 / 318 / 442                                              | 5392/1048/866                                                  | 6249/ 701 / 817                                 | 10738 / 696 / 973                                             |
| <i>GooF</i>                                   | 1.154                                                         | 1.039                                                          | 1.054                                           | 1.149                                                         |
| <i>R</i> [ <i>I</i> > 2σ( <i>I</i> )]         | 0.0840                                                        | 0.0845                                                         | 0.1163                                          | 0.0838                                                        |
| <i>wR</i> 2                                   | 0.2130                                                        | 0.2069                                                         | 0.2271                                          | 0.2240                                                        |

**Table S2:** Selected crystallographic data for the type II co-crystals and the exceptional one.

|                                               | <b>1•(C<sub>60</sub>)<sub>2</sub>•(CS<sub>2</sub>)<sub>2</sub></b> | <b>1•(C<sub>60</sub>)<sub>2</sub>•PhCl</b>         | <b>6•(C<sub>60</sub>)<sub>2</sub>•(PhCl)<sub>2</sub></b>                       | <b>2•(C<sub>70</sub>)<sub>4</sub>•(PhCl)<sub>2</sub></b>        |
|-----------------------------------------------|--------------------------------------------------------------------|----------------------------------------------------|--------------------------------------------------------------------------------|-----------------------------------------------------------------|
| CCDC number                                   |                                                                    |                                                    |                                                                                |                                                                 |
| empirical formula                             | C <sub>152</sub> H <sub>20</sub> S <sub>10</sub>                   | C <sub>156</sub> H <sub>20</sub> S <sub>8</sub> Cl | C <sub>158</sub> H <sub>30</sub> N <sub>4</sub> S <sub>8</sub> Cl <sub>2</sub> | C <sub>326</sub> H <sub>28</sub> S <sub>8</sub> Cl <sub>2</sub> |
| formula weight                                | 2230.40                                                            | 2185.65                                            | 2307.21                                                                        | 4270.86                                                         |
| temperature / K                               | 113(2)                                                             | 291.89(10)                                         | 113(2)                                                                         | 113(2)                                                          |
| $\lambda$ / Å                                 | 0.71073                                                            | 0.71073                                            | 0.71073                                                                        | 0.71073                                                         |
| crystal size / mm <sup>3</sup>                | 0.20×0.20×0.20                                                     | 0.12×0.15×0.20                                     | 0.20×0.20×0.20                                                                 | 0.05×0.05×0.20                                                  |
| crystal system                                | Triclinic                                                          | Triclinic                                          | Triclinic                                                                      | Monoclinic                                                      |
| space group                                   | <i>P</i> -1                                                        | <i>P</i> -1                                        | <i>P</i> -1                                                                    | <i>C</i> 2/n                                                    |
| <i>a</i> / Å                                  | 10.422(4)                                                          | 10.4255(7)                                         | 10.439(4)                                                                      | 22.859(5)                                                       |
| <i>b</i> / Å                                  | 10.386(3)                                                          | 20.8257(19)                                        | 10.466(4)                                                                      | 27.904(6)                                                       |
| <i>c</i> / Å                                  | 21.722(7)                                                          | 21.2111(11)                                        | 42.064(18)                                                                     | 26.409(6)                                                       |
| $\alpha$ / °                                  | 73.300(16)                                                         | 101.302(6)                                         | 83.276(15)                                                                     | 90                                                              |
| $\beta$ / °                                   | 73.605(16)                                                         | 101.293(5)                                         | 83.192(15)                                                                     | 92.808(5)                                                       |
| $\gamma$ / °                                  | 78.378(19)                                                         | 100.743(6)                                         | 79.164(17)                                                                     | 90                                                              |
| <i>V</i> / Å <sup>3</sup>                     | 2142.0(13)                                                         | 4310.0(6)                                          | 4461.0(3)                                                                      | 16825.0(7)                                                      |
| <i>Z</i>                                      | 1                                                                  | 2                                                  | 2                                                                              | 4                                                               |
| <i>d</i> <sub>calc</sub> / g cm <sup>-3</sup> | 1.729                                                              | 1.684                                              | 1.718                                                                          | 1.686                                                           |
| $\mu$ / mm <sup>-1</sup>                      | 0.380                                                              | 0.313                                              | 0.337                                                                          | 0.223                                                           |
| $2\theta_{\text{max}}$ / °                    | 52.04                                                              | 57.94                                              | 52.05                                                                          | 52.05                                                           |
| Data / restraints / parameters                | 8341 / 515 / 720                                                   | 19916 / 1002 / 1387                                | 13413 / 1040 / 1438                                                            | 16564 / 1032 / 1534                                             |
| <i>GooF</i>                                   | 1.071                                                              | 1.896                                              | 1.092                                                                          | 1.085                                                           |
| <i>R</i> [ <i>I</i> > 2σ( <i>I</i> )]         | 0.1067                                                             | 0.1826                                             | 0.1195                                                                         | 0.0856                                                          |
| <i>wR</i> <sup>2</sup>                        | 0.2238                                                             | 0.3598                                             | 0.2620                                                                         | 0.1793                                                          |

## References

1. Sun, J.; Lu, X.; Shao, J.; Li, X.; Zhang, S.; Wang, B.; Zhao, J.; Shao, Y.; Fang, R.; Wang, Z.; Yu, W.; Shao, X. *Chem. Eur. J.*, **2013**, *19*, 12517. doi: 10.1002/chem.201301819
2. Sun, J.; Lu, X.; Shao, J.; Cui, Z.; Shao, Y.; Jiang, G.; Yu, W.; Shao, X. *RSC Adv.*, **2013**, *3*, 10193. doi: 10.1039/C3RA41349G
3. Sun, J.; Lu, X.; Ishikawa, M.; Nakano, Y.; Zhang, S.; Zhao, J.; Shao, Y.; Wang, Z.; Yamochi, H.; Shao, X. *J. Mater. Chem. C*, **2014**, *2*, 8017. doi: 10.1002/chem.201402327
4. Burla, M. C.; Caliendo, R.; Camalli, M.; Carrozzini, B.; Cascarano, G. L.; de Caro, L.; Giacovazzo, C.; Polidori, G.; Spagna, R. *J. Appl. Cryst.*, **2005**, *38*, 381. doi: 10.1107/S002188980403225X
5. Sheldrick, G. M. *SHELXL-97, A Program for Crystal Structure Refinement*. University of Göttingen, Göttingen, Germany, **1997**.

## Crystal structures

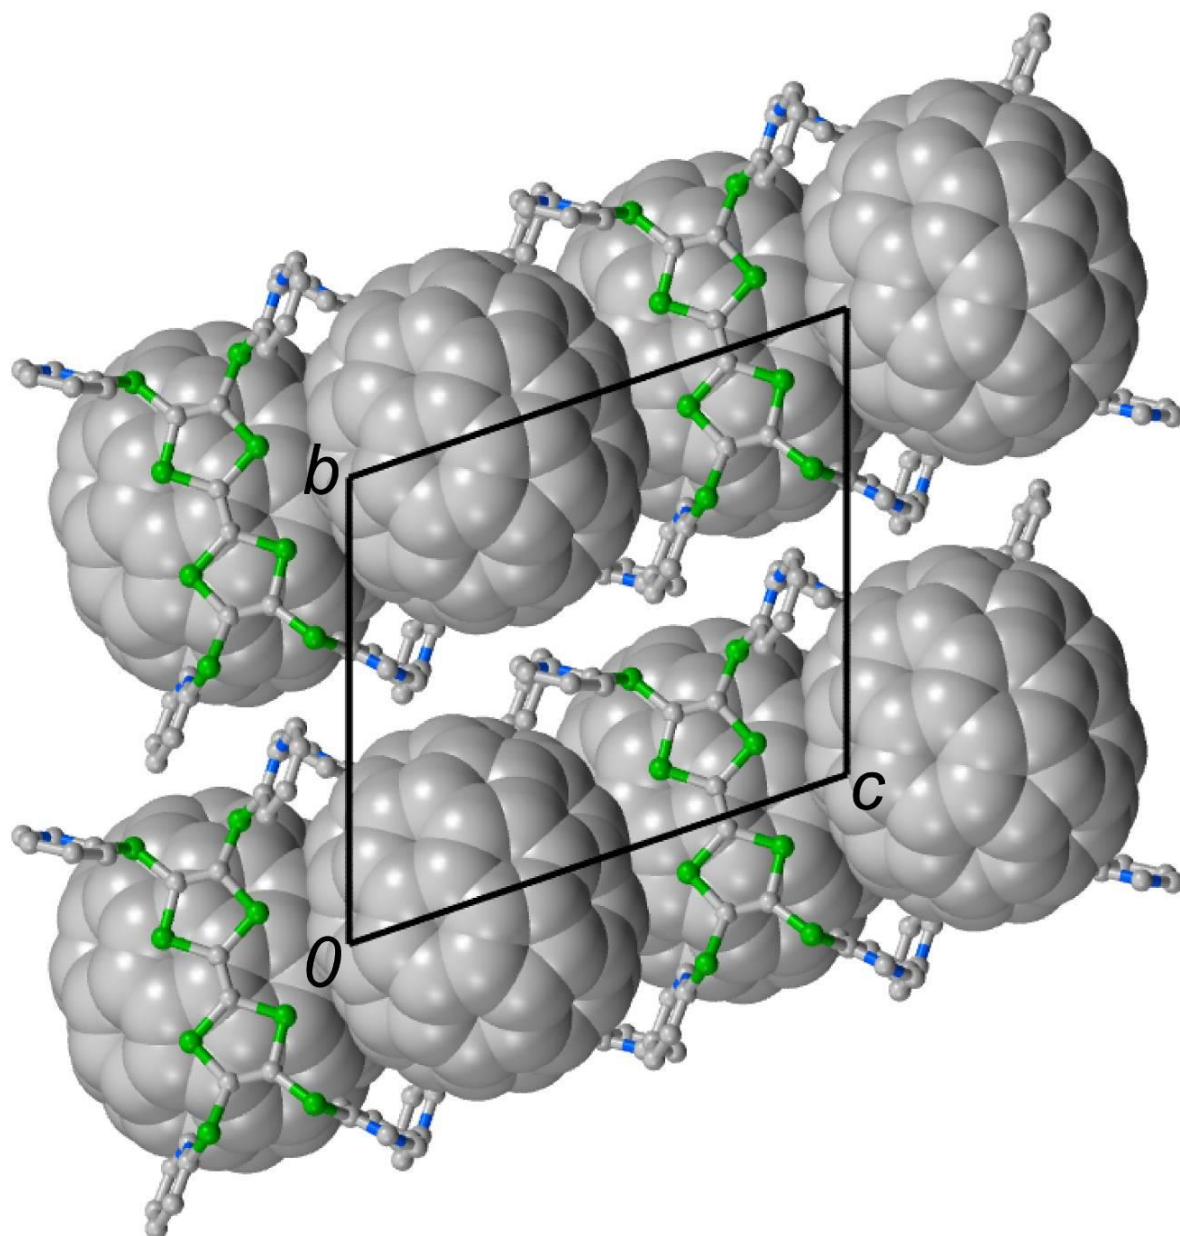

**Figure S1:** Crystal structure of 5•C<sub>70</sub> projected along the crystallographic *a*-axis. The C<sub>70</sub> molecules are drawn in spacefill style and the hydrogen atoms omitted for clarity.

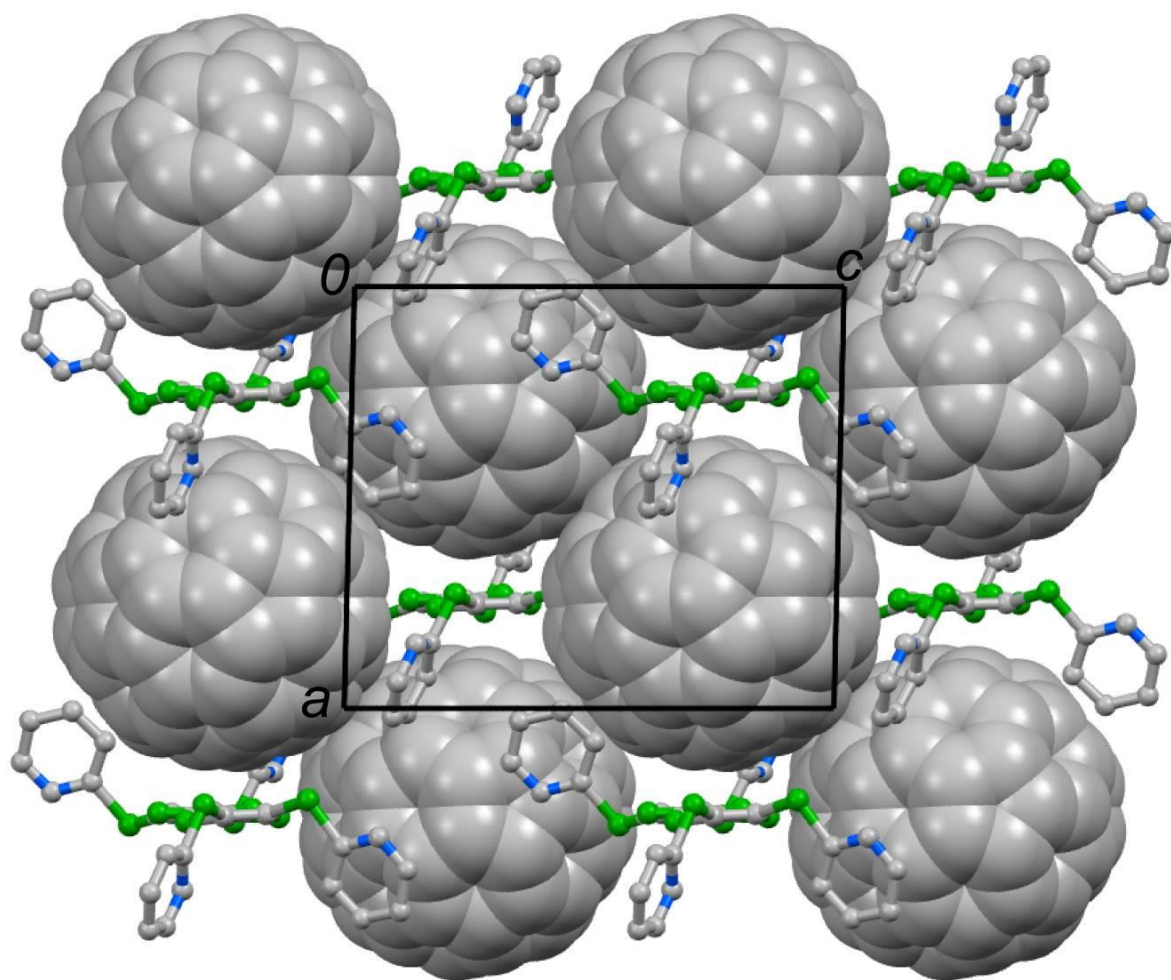

**Figure S2:** Crystal structure of  $5\cdot C_{70}$  projected along the crystallographic  $b$ -axis. The  $C_{70}$  molecules are drawn in spacefill style and the hydrogen atoms omitted for clarity.

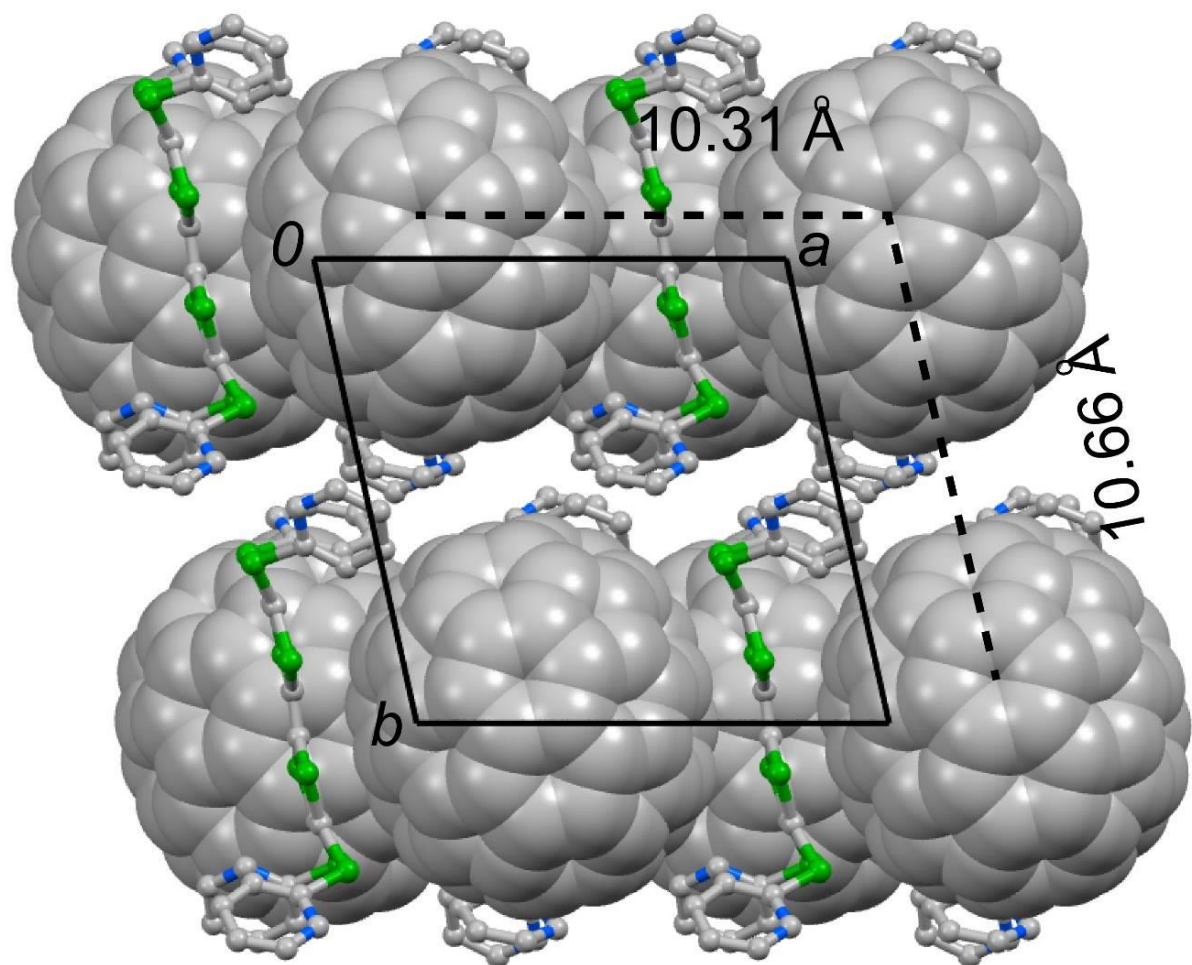

**Figure S3:** Crystal structure of  $5\bullet C_{70}$  projected along the crystallographic  $c$ -axis. The  $C_{70}$  molecules are drawn in spacefill style and the hydrogen atoms omitted for clarity.



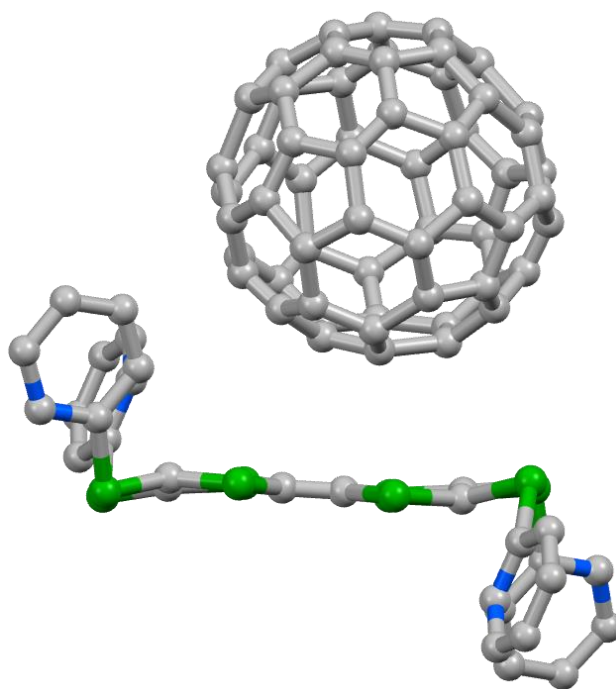

**Figure S4:** The unit cell contents of  $7 \cdot C_{60}$  viewed along the short axis of **7**. The hydrogen atoms are omitted for clarity. The complex crystallizes in the triclinic space group  $P-1$ , and the asymmetric unit contains one **7** and one  $C_{60}$ . The central TTF core on **7** is nearly planar. The phenyl groups and the 2-pyridyl groups are disordered. Thus, it is difficult to distinguish the phenyl and 2-pyridyl groups by the single crystal structure analysis.

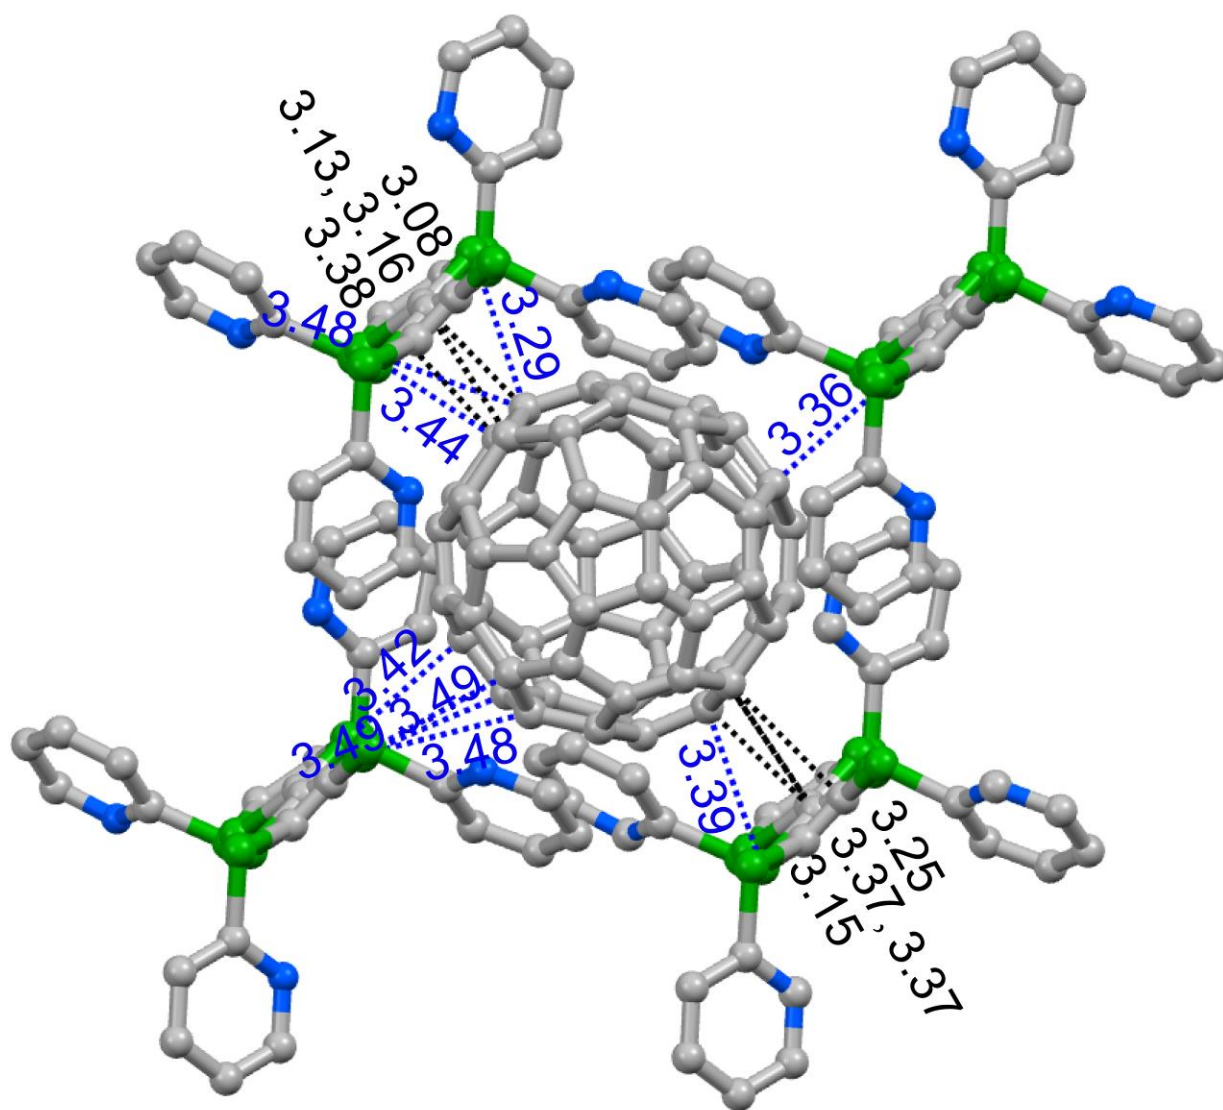

**Figure S5:** Intermolecular atomic short contacts (blue and black dashed lines for C–S and C–C contacts respectively, in unit of Å) between the central core of **7** and C<sub>60</sub> in **7**•C<sub>60</sub>. The grey, blue and green balls represent carbon, nitrogen and sulfur atoms, respectively, and the hydrogen atoms are omitted for clarity.

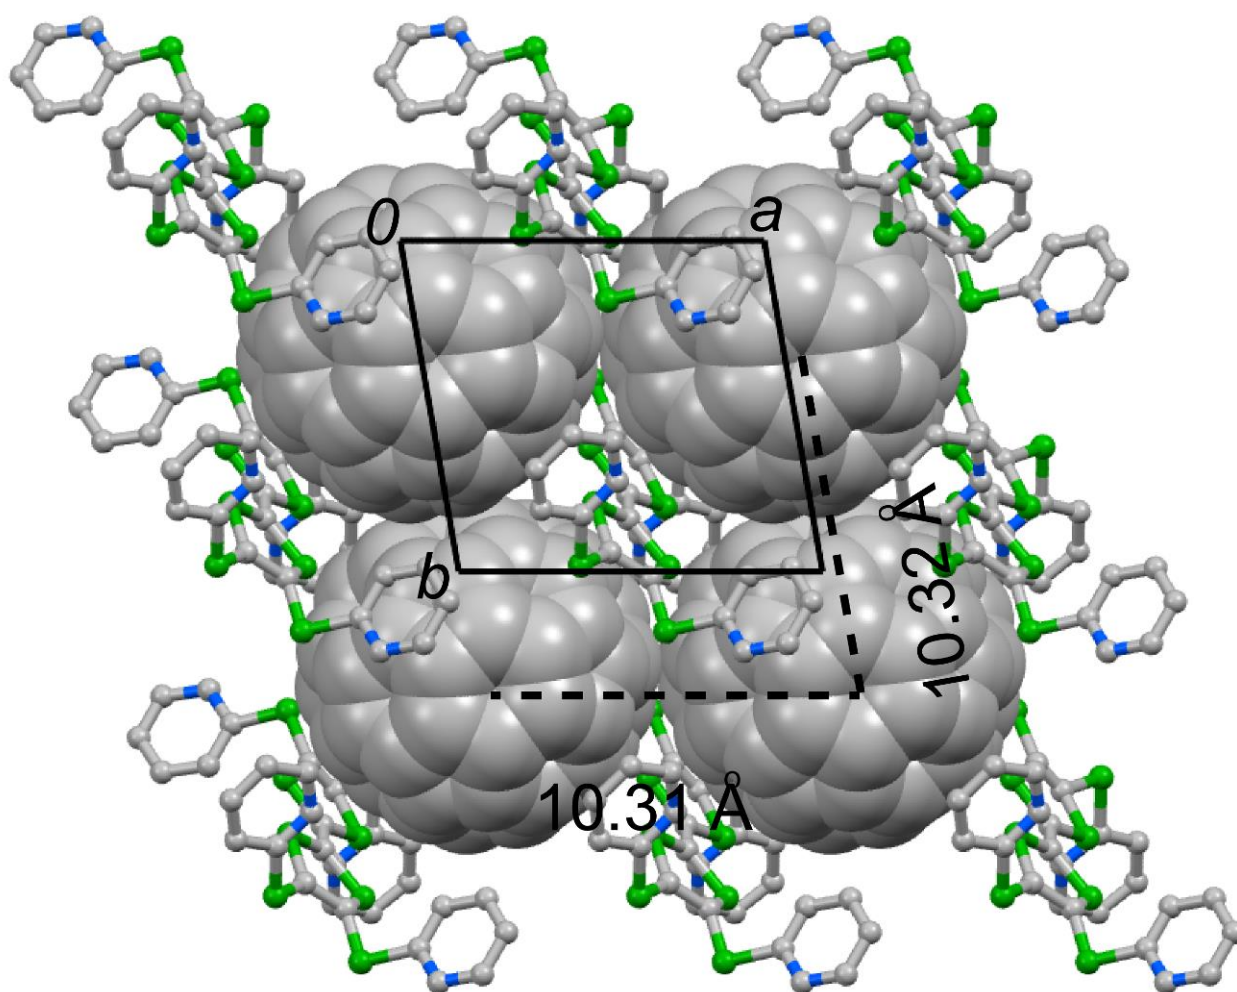

**Figure S6:** Crystal structure of  $7 \cdot C_{60}$  projected along the crystallographic  $c$ -axis. The centre-to-centre distances between neighboring  $C_{60}$  molecules along the  $a$ - and  $b$ -axes are 10.31 and 10.32 Å respectively. The  $C_{60}$  molecules are drawn in spacefill style and the hydrogen atoms are omitted for clarity.

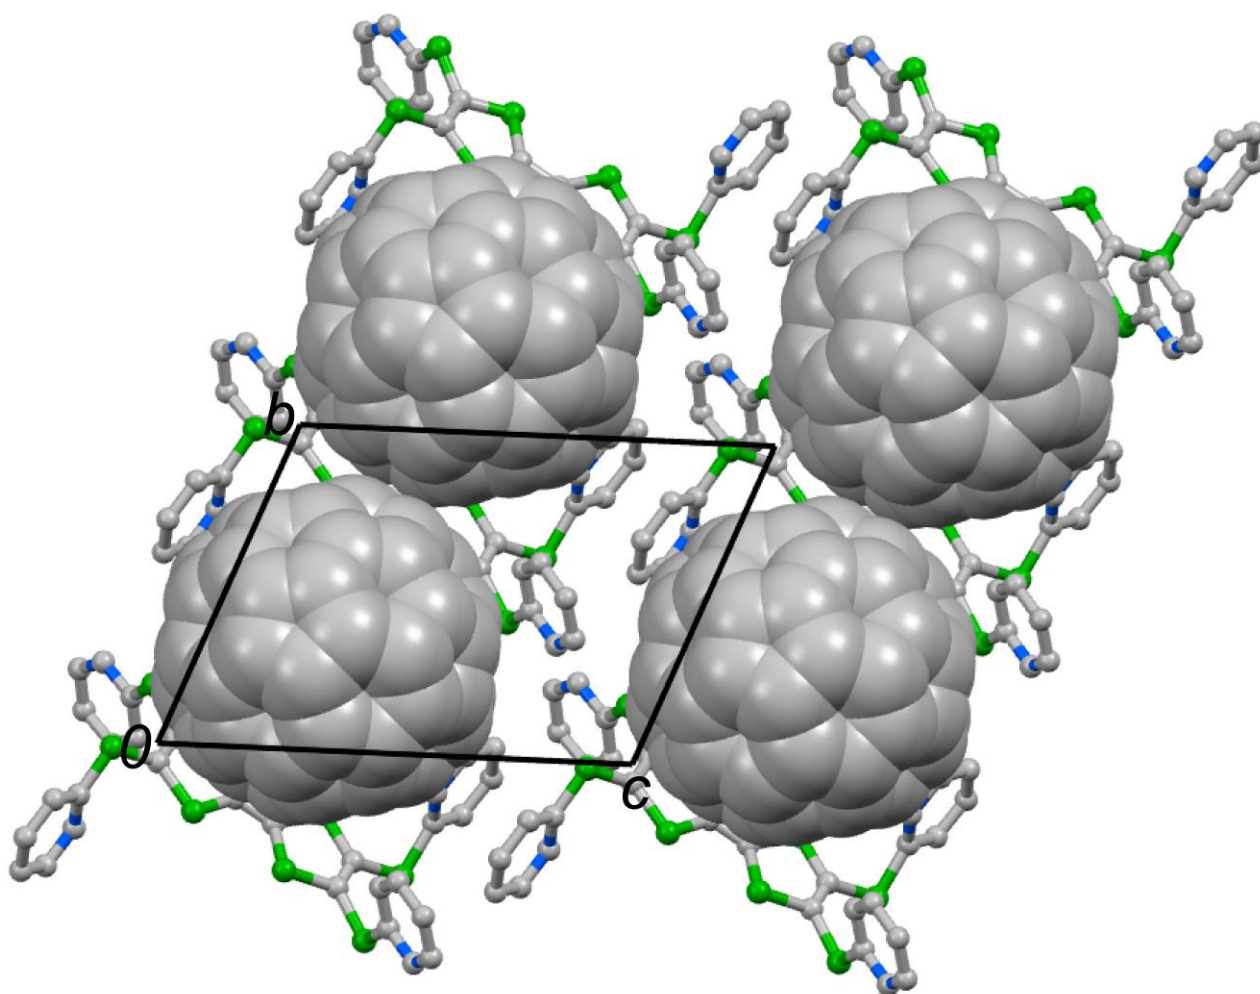

**Figure S7:** Crystal structure of  $7 \cdot C_{60}$  projected along the crystallographic  $a$ -axis with hydrogen atoms omitted for clarity. The  $C_{60}$  molecules are drawn in spacefill style.

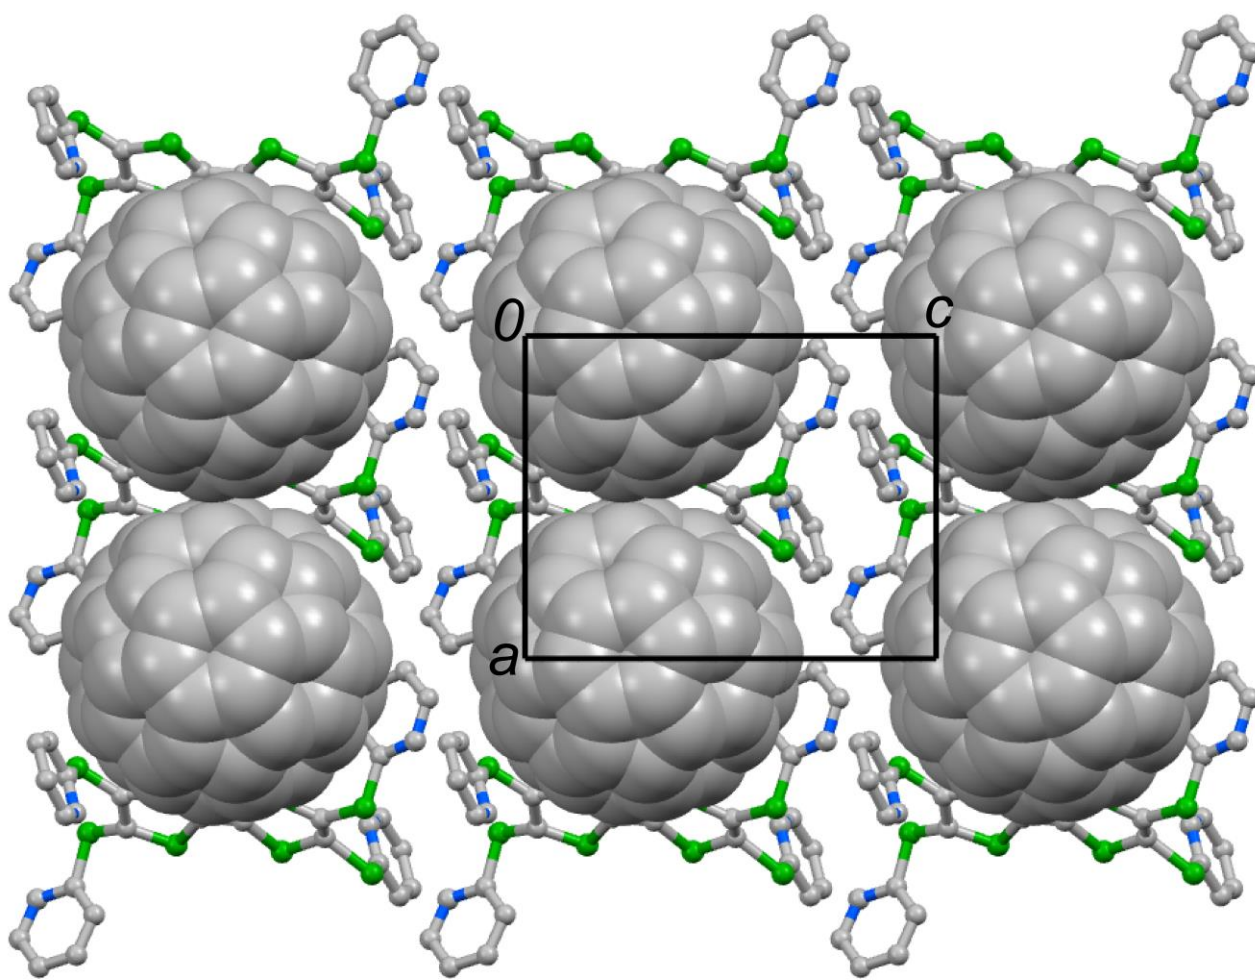

**Figure S8:** Crystal structure of  $7 \cdot \text{C}_{60}$  projected along the crystallographic  $b$ -axis. The  $\text{C}_{60}$  molecules are drawn in spacefill style and the hydrogen atoms are omitted for clarity.



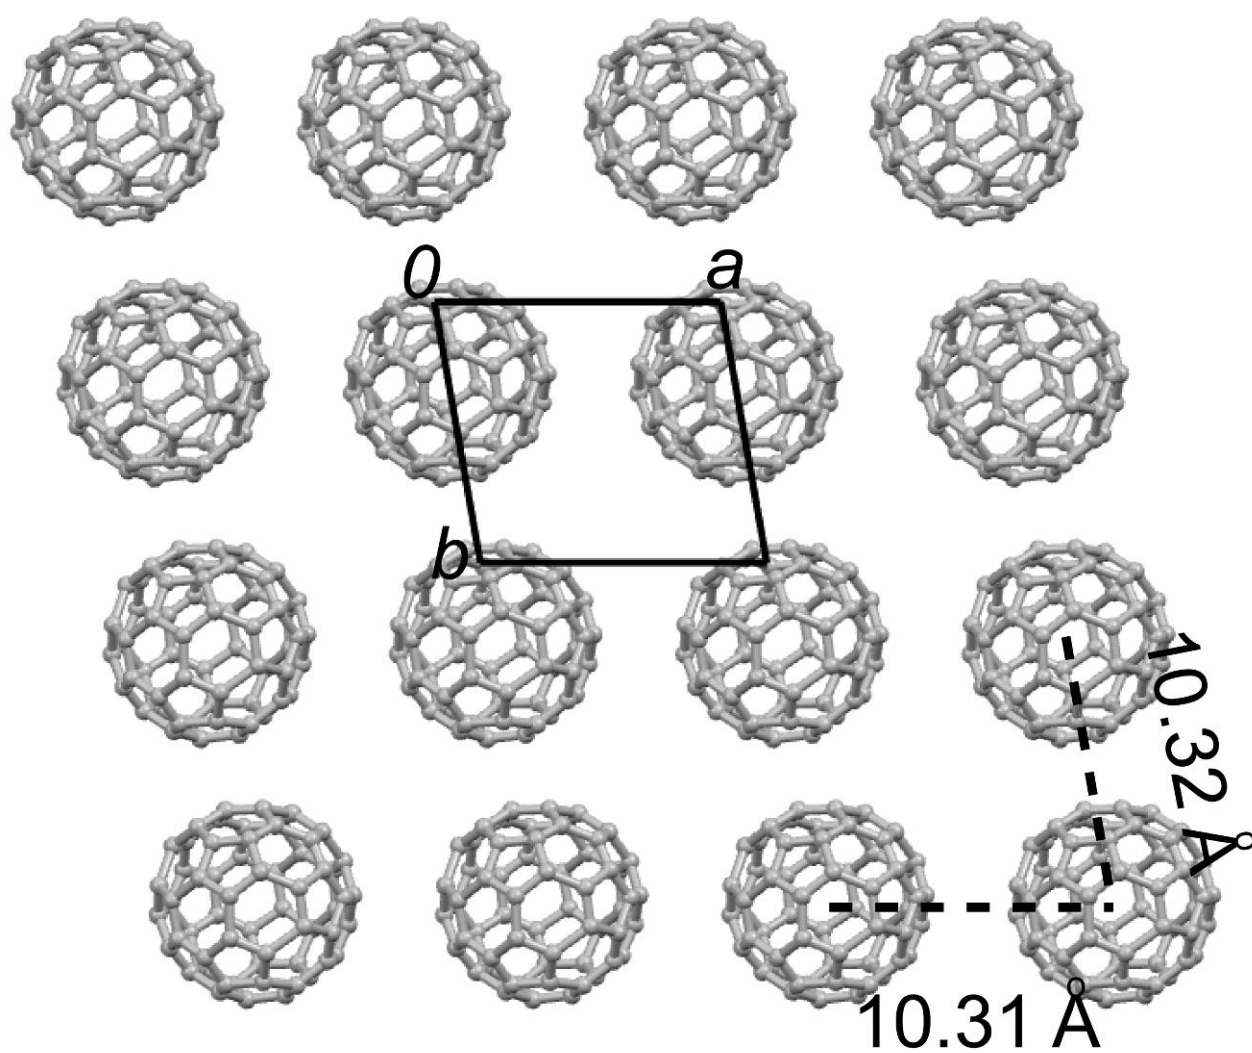

**Figure S9:** The  $C_{60}$  molecules arrangement in the  $ab$ -plane in complex  $7 \cdot C_{60}$ . The center-to-center distances between  $C_{60}$  molecules along  $a$ - and  $b$ -axis are 10.32 Å and 10.31 Å, respectively.

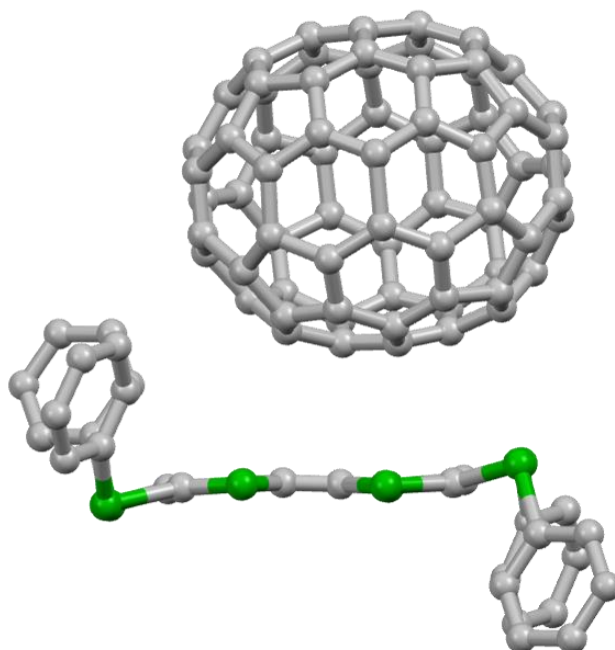

**Figure S10:** The unit cell contents of  $\mathbf{1}\cdot\text{C}_{70}$  viewed along the short axis of  $\mathbf{1}$ . The complex crystallizes in the triclinic space group  $P1$ , and the asymmetric unit contains one  $\mathbf{1}$  molecule and one  $\text{C}_{70}$  molecule. The central TTF core on  $\mathbf{1}$  is nearly planar. The long axis of  $\text{C}_{70}$  and  $\mathbf{1}$  are almost parallel to each other. The hydrogen atoms are omitted for clarity.

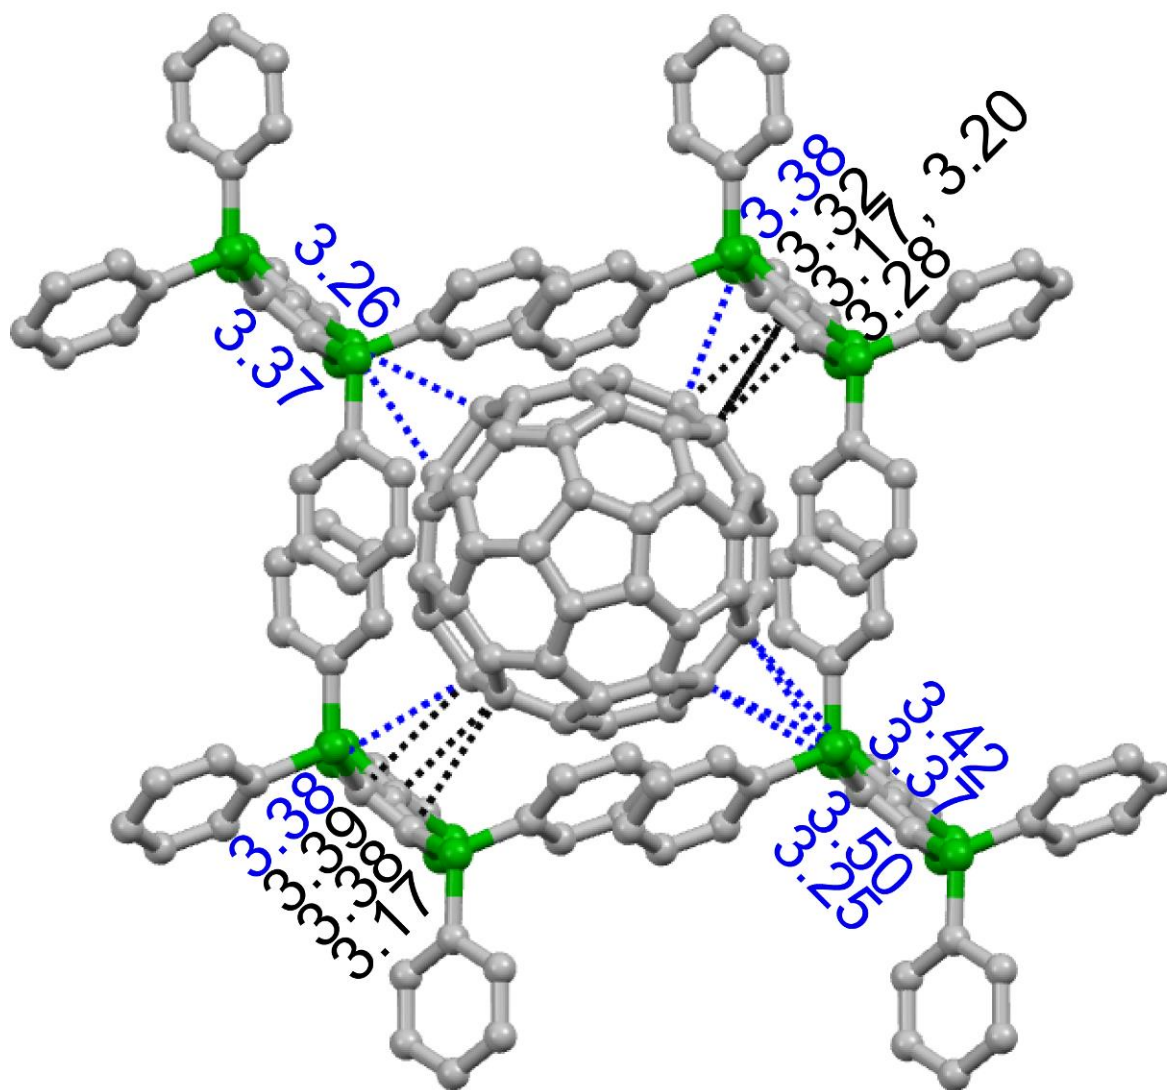

**Figure S11:** Encapsulation of  $C_{70}$  in  $\mathbf{1} \cdot C_{70}$ . The blue and black dashed lines indicate the intermolecular C–S and C–C contacts between the central core of **1** and  $C_{70}$ , respectively. The C–C atomic short contacts are also observed between the aryls substituents and  $C_{70}$ : 3.22 to 3.36 Å. The grey and green balls represent carbon and sulfur atoms respectively, and the hydrogen atoms are omitted for clarity.



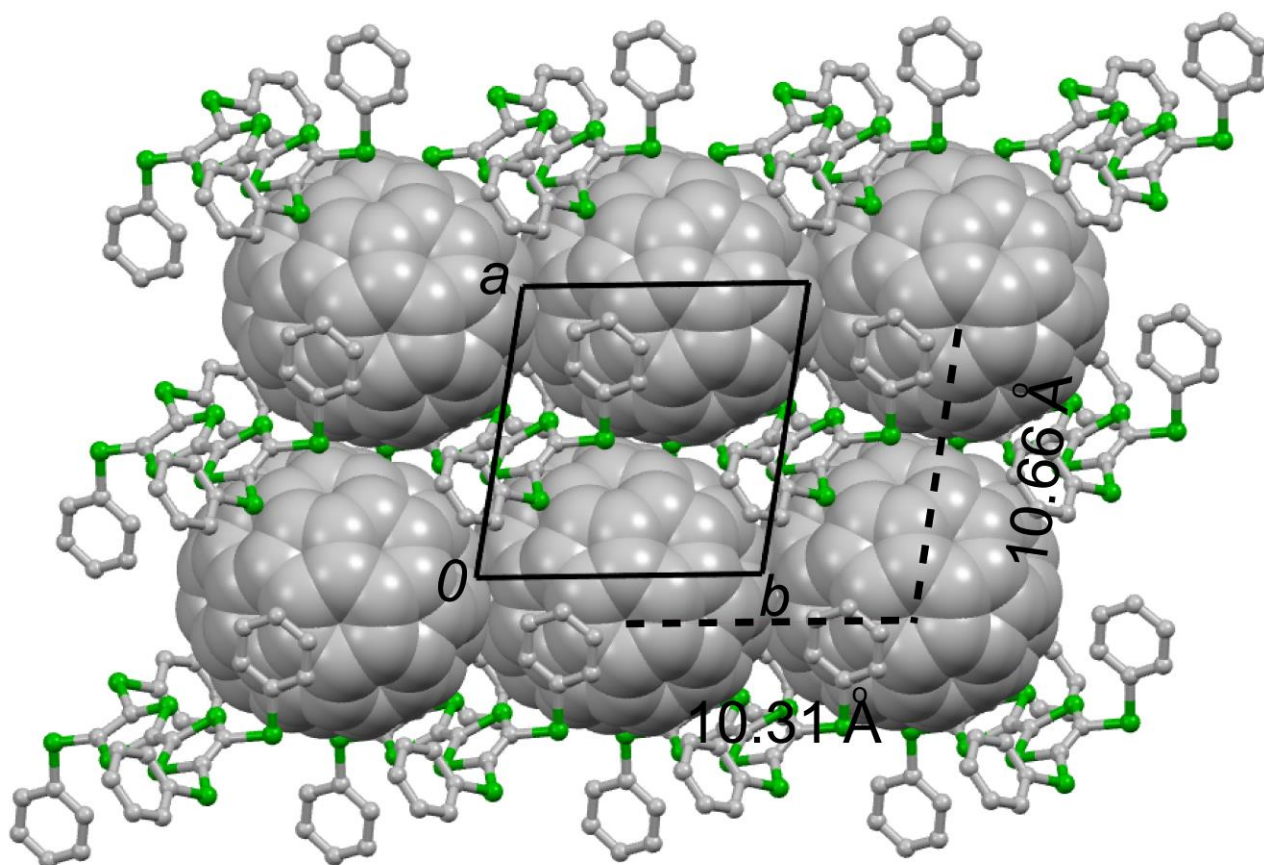

**Figure S12:** Crystal structure of  $1 \cdot C_{70}$  projected along the crystallographic  $c$ -axis. The centre-to-centre distances between neighboring  $C_{70}$  molecules along the  $a$ - and  $b$ -axes are 10.31 and 10.66 Å, respectively. The  $C_{70}$  molecules are drawn in spacefill style and the hydrogen atoms are omitted for clarity.

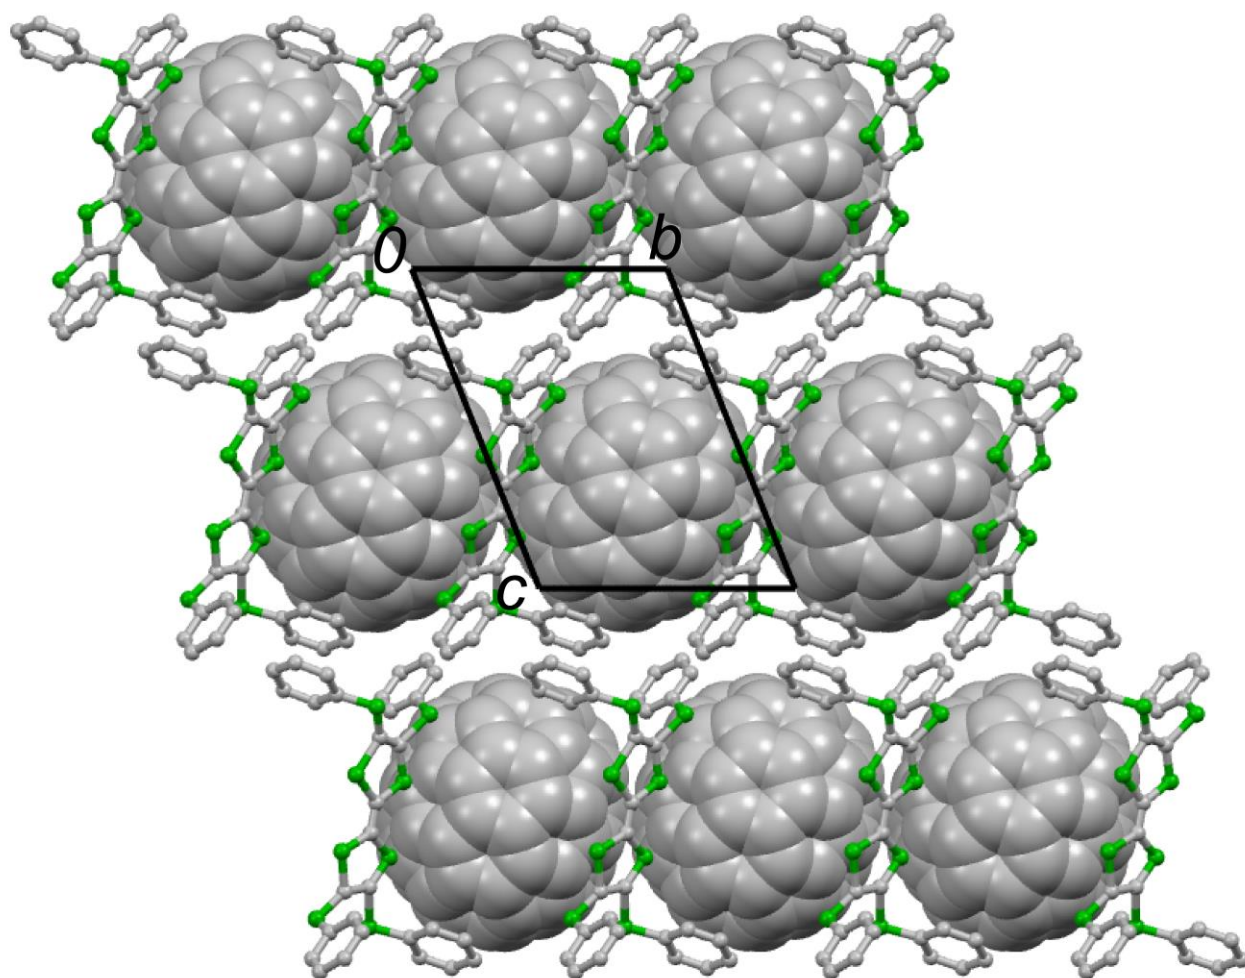

**Figure S13:** Crystal structure of  $1\cdot\text{C}_{70}$  projected along the crystallographic  $a$ -axis. The  $\text{C}_{70}$  molecules are drawn in spacefill style and the hydrogen atoms are omitted for clarity.

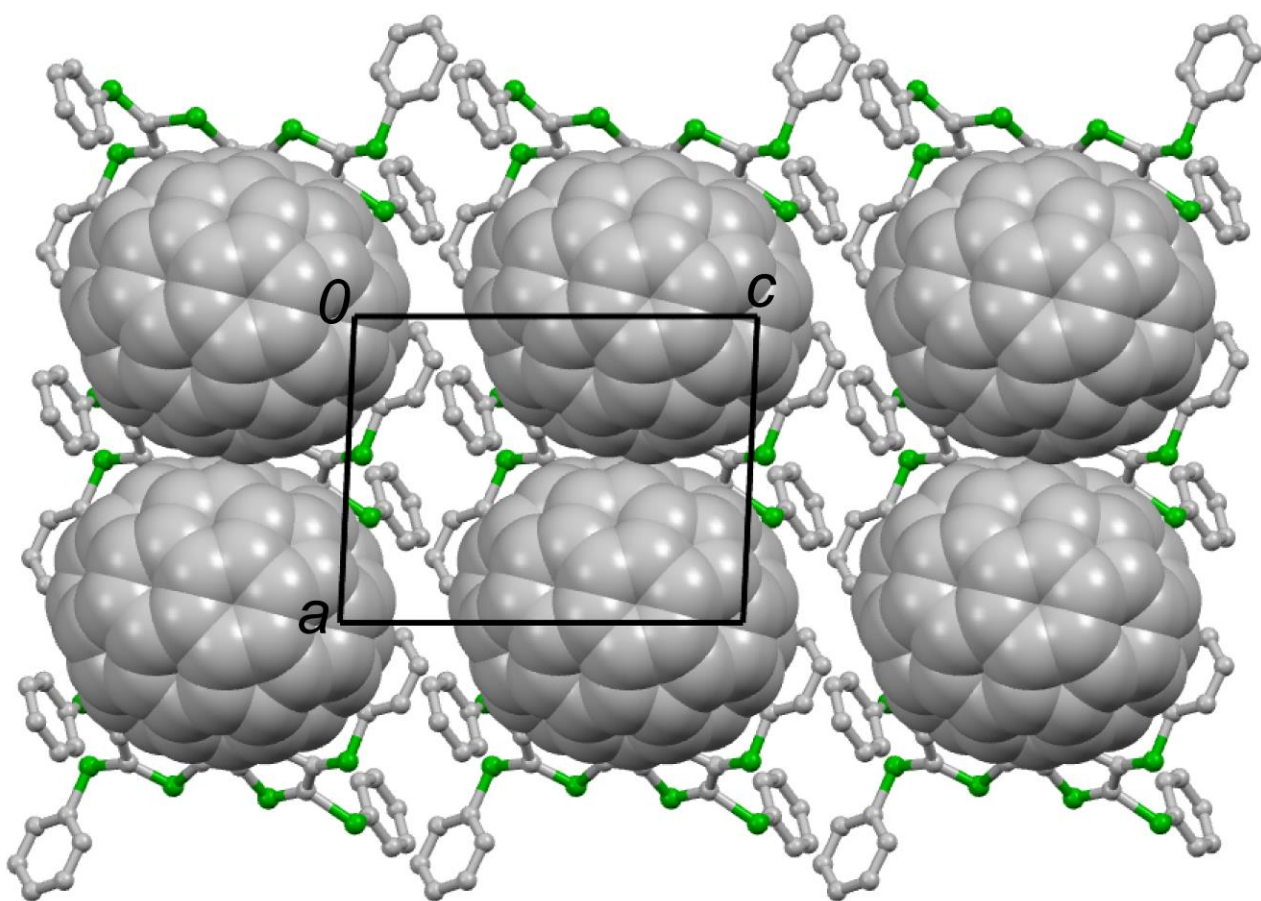

**Figure S14:** Crystal structure of **1•C<sub>70</sub>** projected along the crystallographic *b*-axis. The C<sub>70</sub> molecules are drawn in spacefill style and the hydrogen atoms are omitted for clarity.

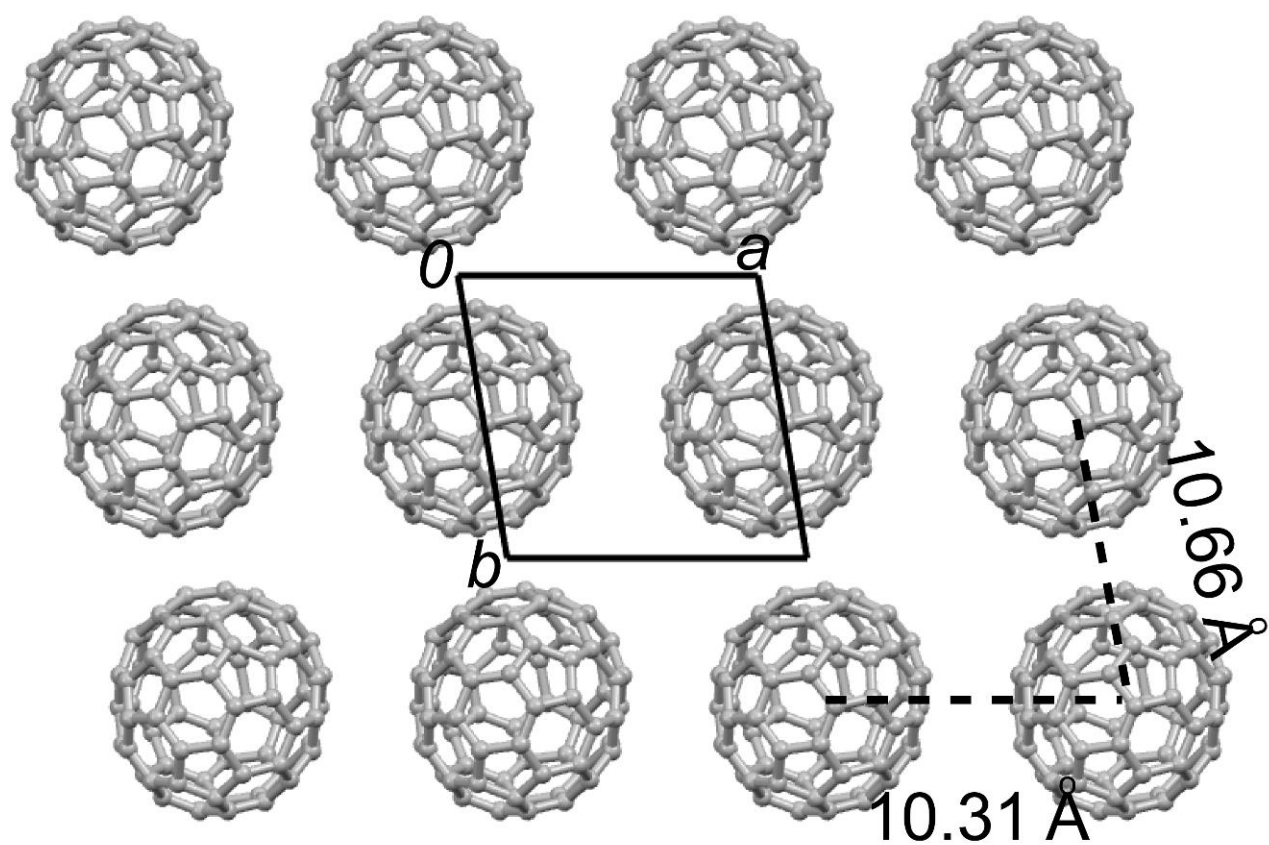

**Figure S15:** The C<sub>70</sub> molecules arrangement in the *ab*-plane in complex **1**•C<sub>70</sub>. The center-to-center distances between C<sub>70</sub> molecules along *a*- and *b*-axis are 10.31 Å and 10.66 Å, respectively.



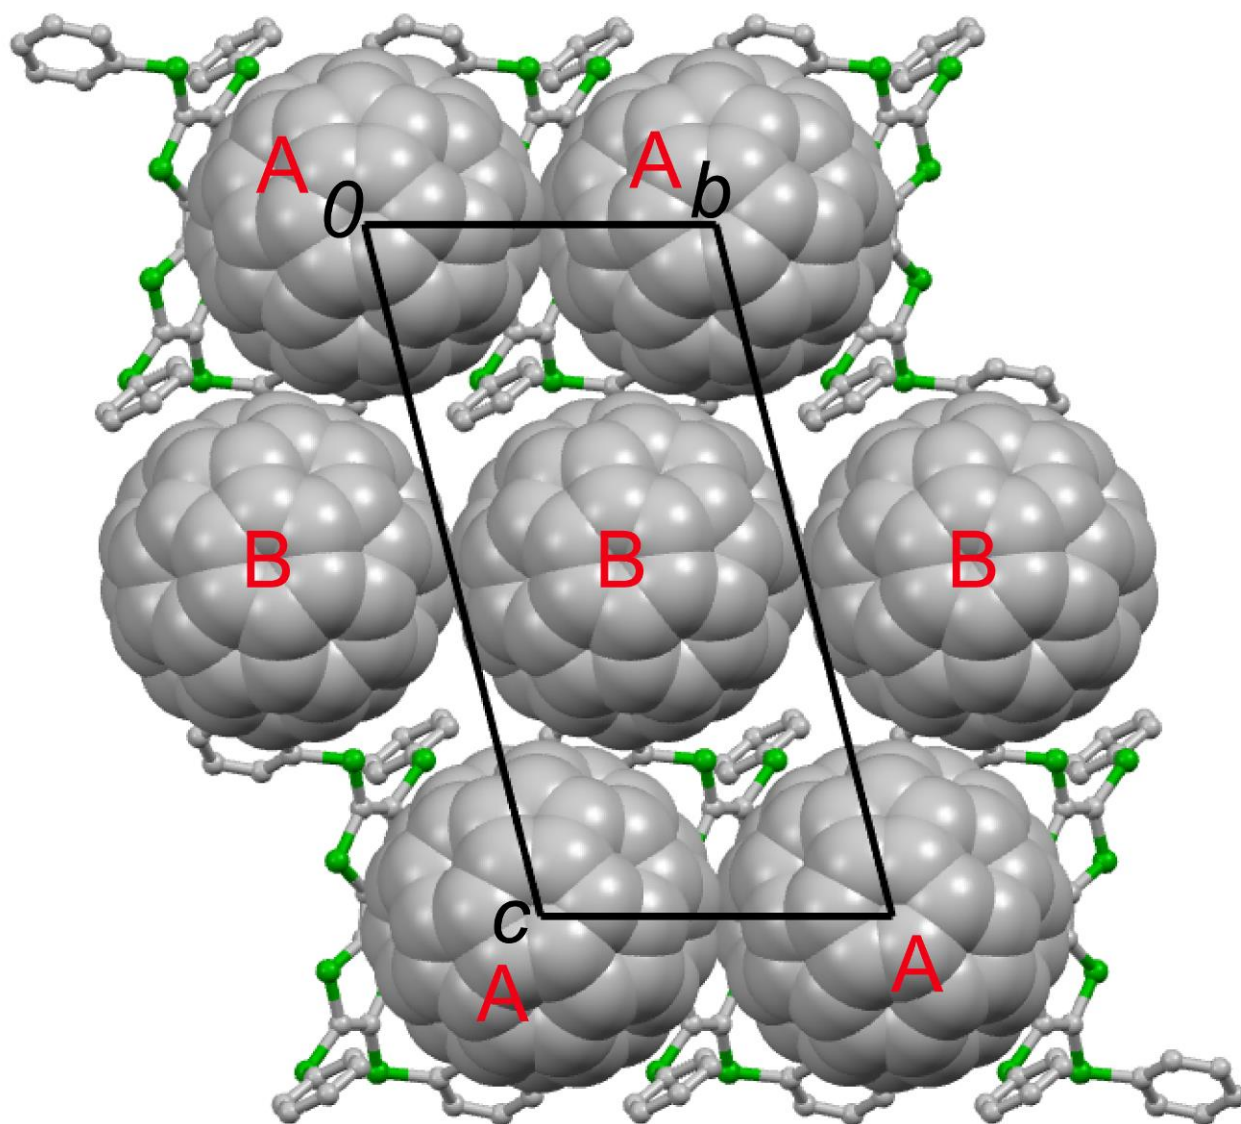

**Figure S16:** Crystal structure of  $1 \cdot (C_{60})_2 \cdot (CS_2)_2$  projected along the crystallographic  $a$ -axis, where  $A$  and  $B$  represent two kinds of  $C_{60}$  molecules as described in the main text. The  $C_{60}$  molecules are drawn in spacefill style, and the hydrogen atoms and  $CS_2$  molecules are omitted for clarity.

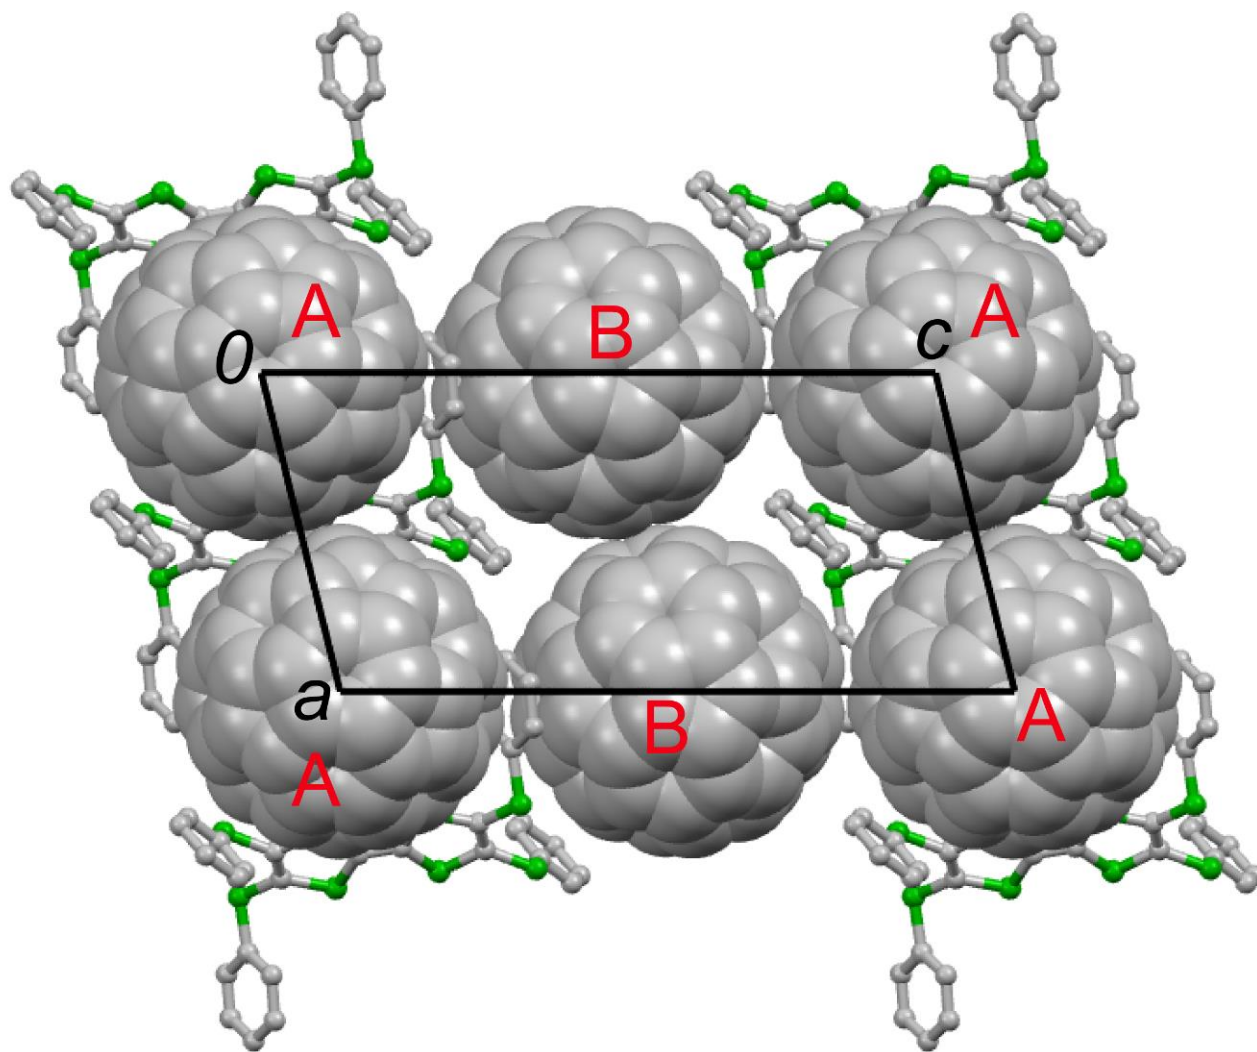

**Figure S17:** Crystal structure of  $1 \cdot (C_{60})_2 \cdot (CS_2)_2$  projected along the crystallographic  $b$ -axis. The  $C_{60}$  molecules are drawn in spacefill style and the hydrogen atoms are omitted for clarity.

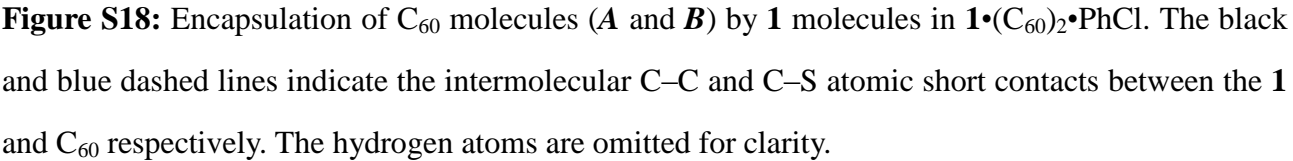

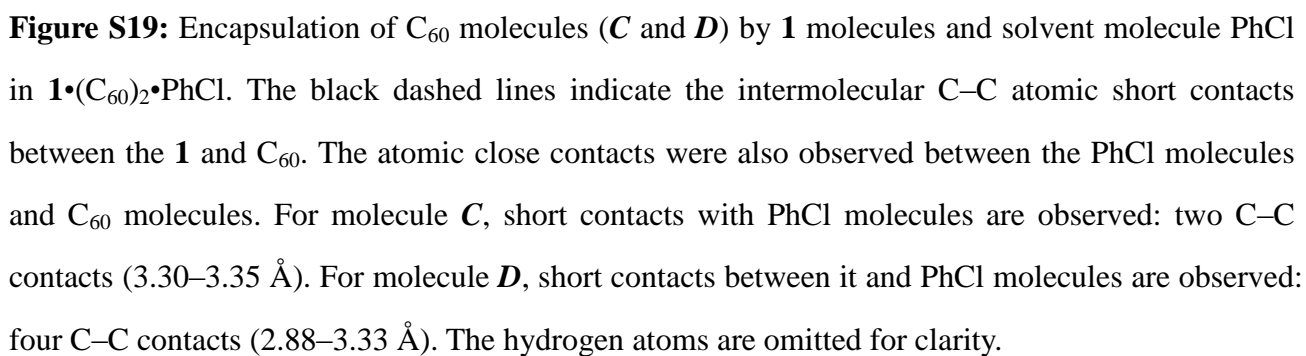



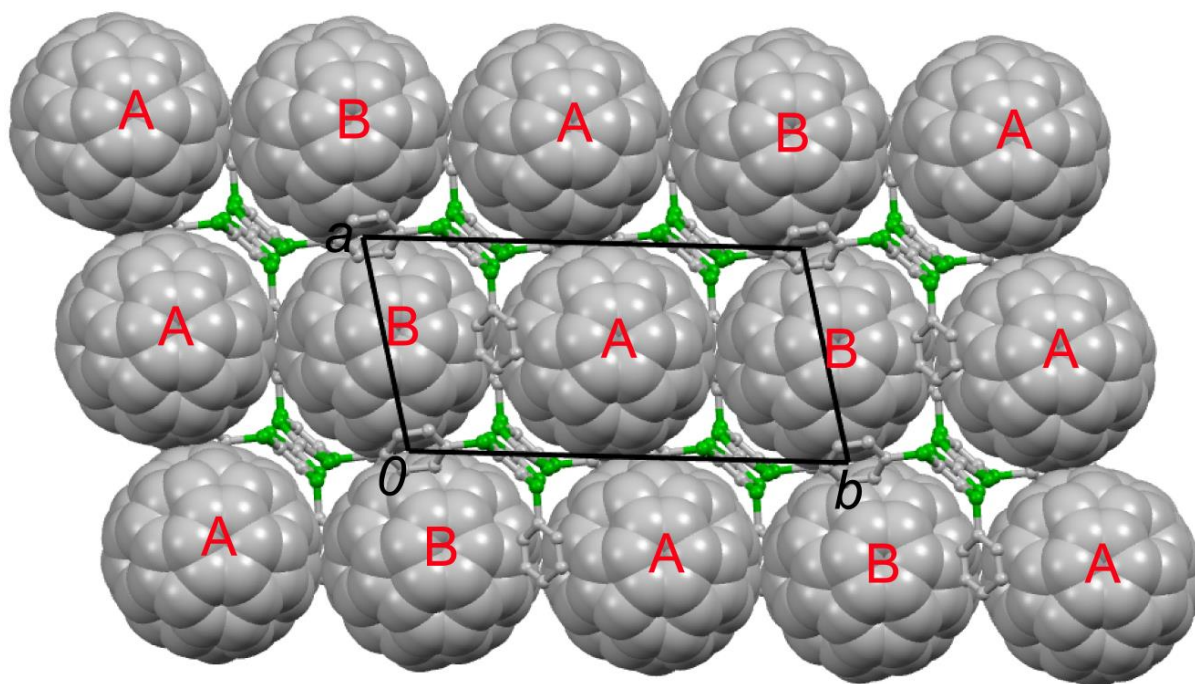

**Figure S20:** Crystal structure of  $1 \cdot (C_{60})_2 \cdot PhCl$  projected along the crystallographic  $c$ -axis. The  $C_{60}$  molecules are drawn in spacefill style, and the hydrogen atoms and solvent molecules are omitted for clarity.

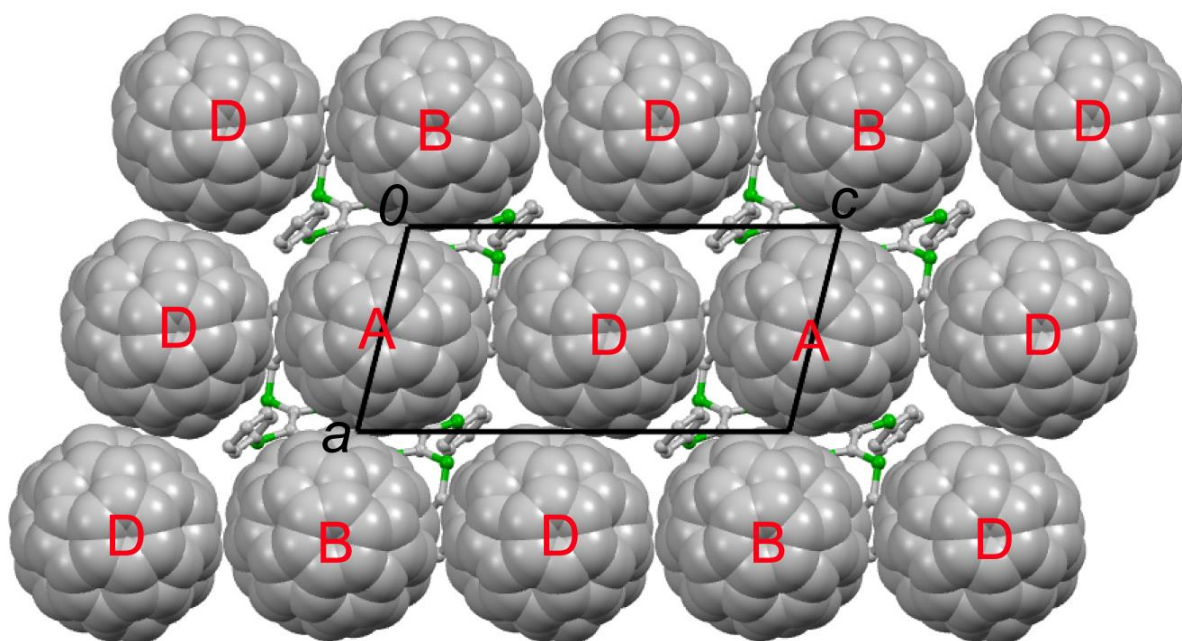

**Figure S21:** Crystal structure of  $1 \cdot (C_{60})_2 \cdot PhCl$  projected along the crystallographic  $b$ -axis. The  $C_{60}$  molecules are drawn in spacefill style, and the hydrogen atoms and solvent molecules are omitted for clarity.

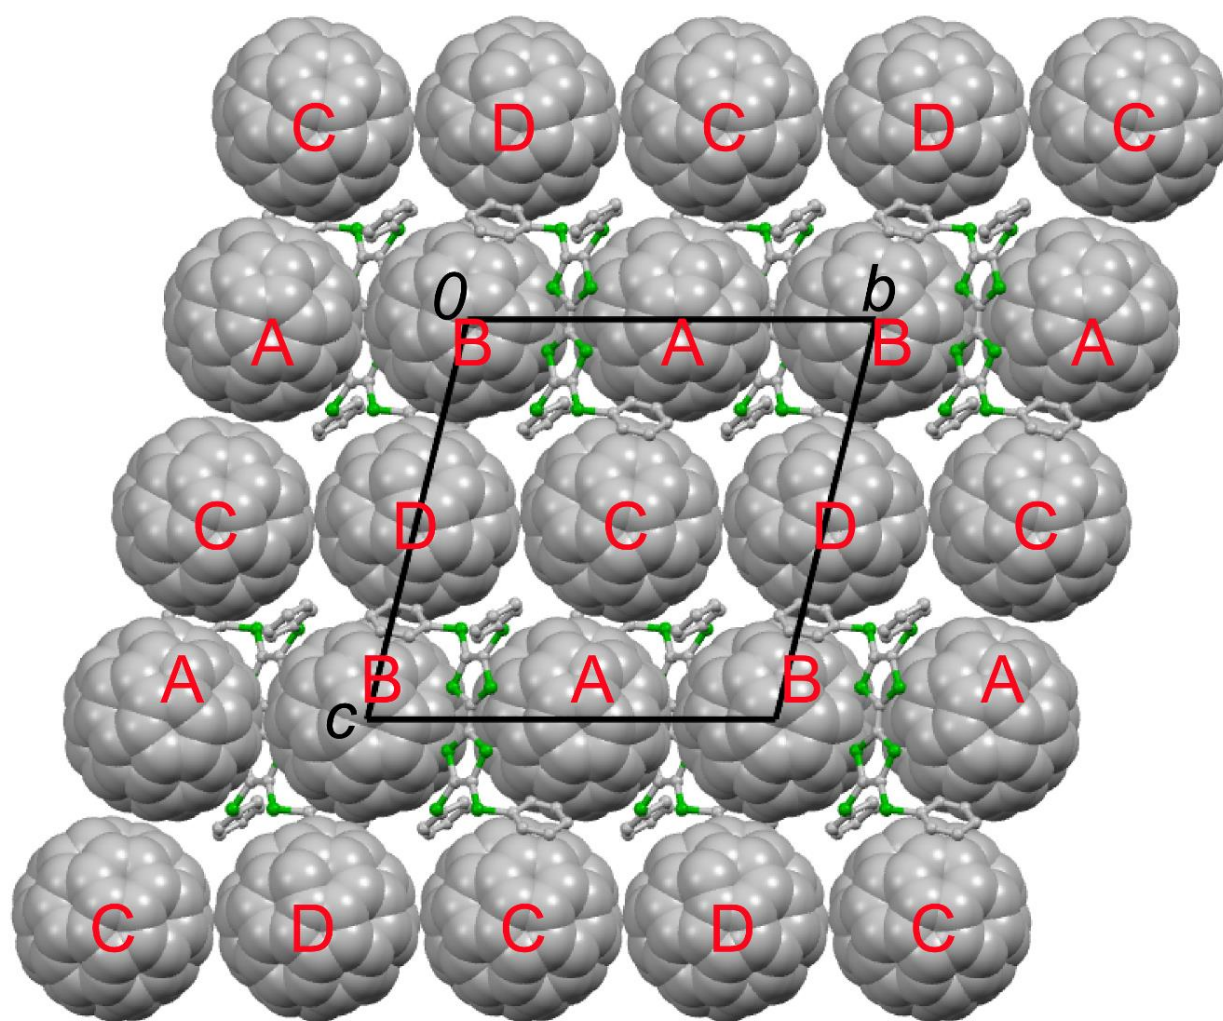

**Figure S22:** Crystal structure of  $1 \cdot (C_{60})_2 \cdot PhCl$  projected along the crystallographic  $a$ -axis. The  $C_{60}$  molecules are drawn in spacefill style, and the hydrogen atoms and solvent molecules are omitted for clarity.

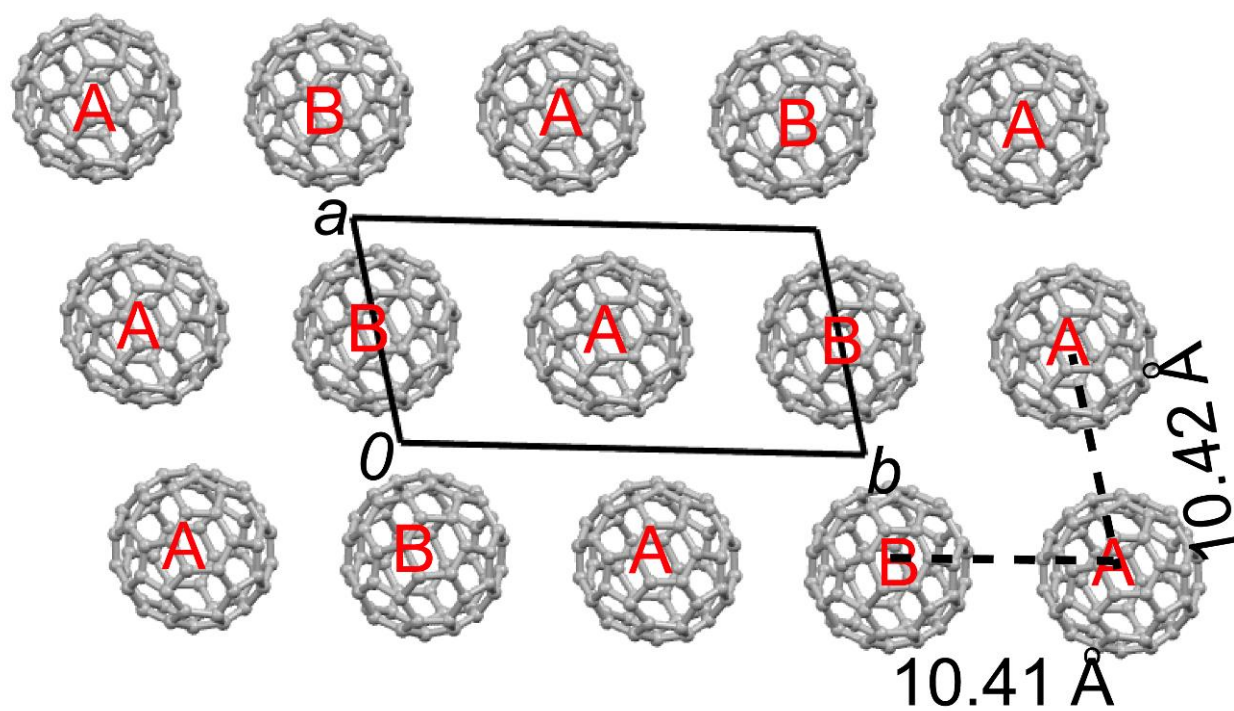

**Figure S23:** Arrangement of  $C_{60}$  molecules *A* and *B* in the *ab*-plane in complex  $1 \cdot (C_{60})_2 \cdot \text{PhCl}$ .

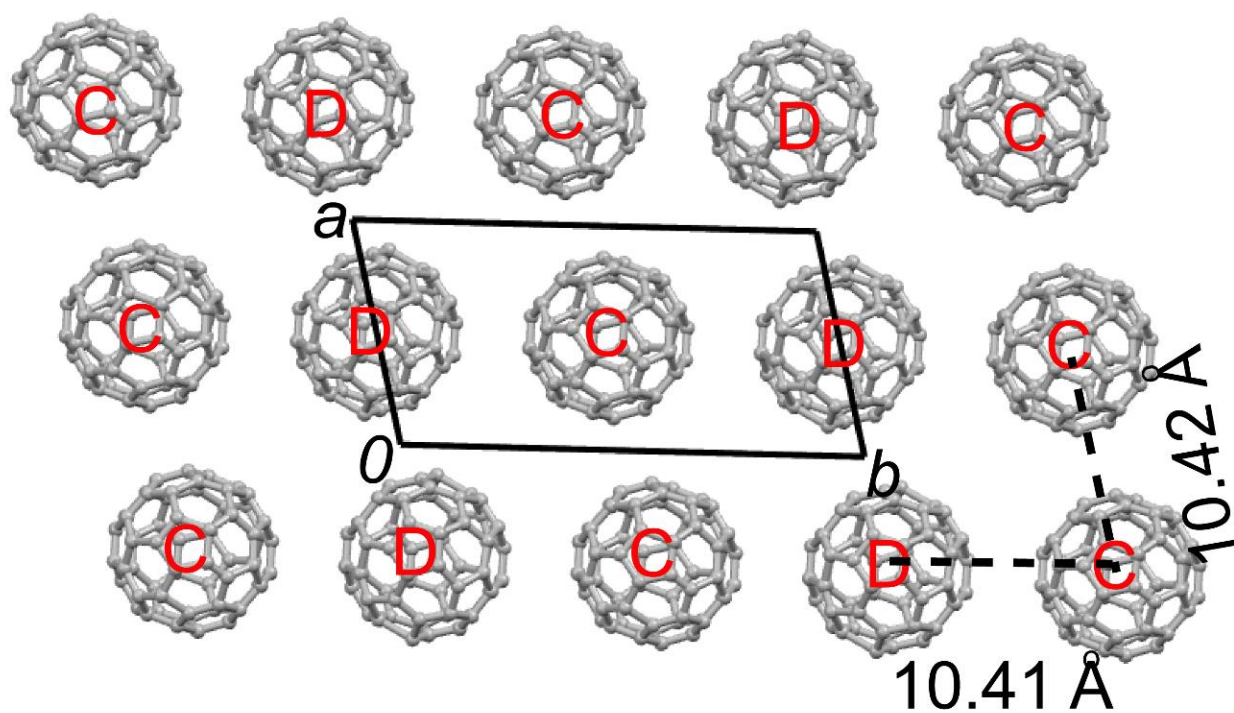

**Figure S24:** Arrangement of  $C_{60}$  molecules *C* and *D* in the *ab*-plane in complex  $1 \cdot (C_{60})_2 \cdot \text{PhCl}$ .



$6 \cdot (C_{60})_2 \cdot (PhCl)_2$  crystallizes in the triclinic space group  $P-1$ , and the asymmetric unit contains one molecule **6**, two  $C_{60}$  molecules and two PhCl molecules. The central TTF core on **6** is in boat conformation.

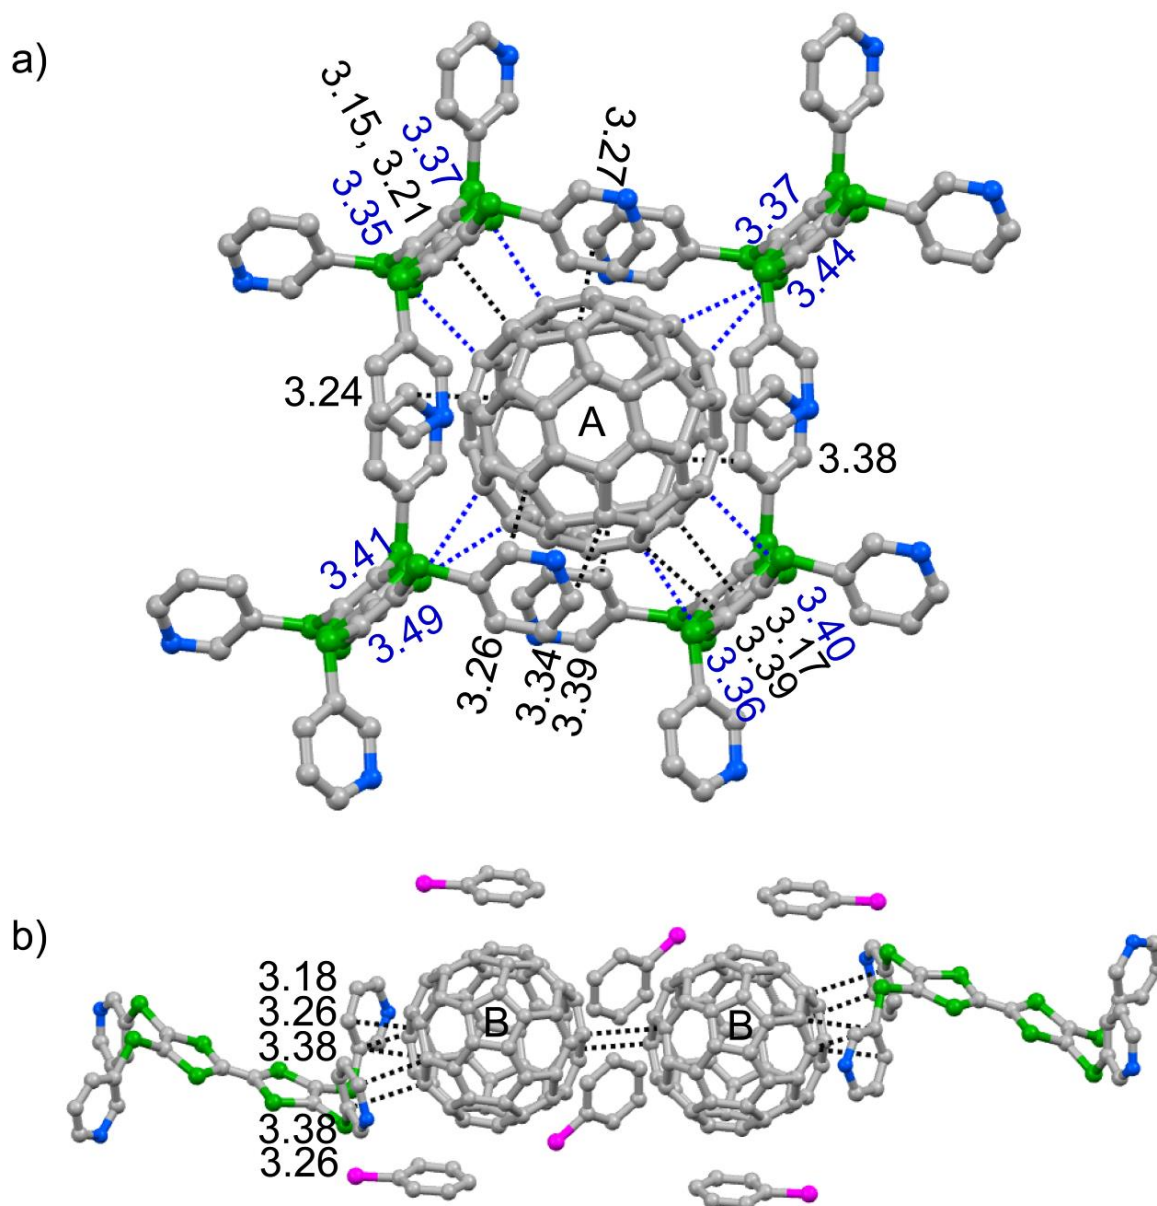

**Figure S25:** Encapsulation of  $C_{60}$  molecules (**A** and **B**) by **6** and solvent PhCl in  $6 \cdot (C_{60})_2 \cdot (PhCl)_2$ . a) **A** is encapsulated by four molecules **6**; b) two **B** molecules acted as dimer through two C-C interactions (3.36 Å) and the dimer is surrounded by two **6** and six PhCl molecules. The blue and black dashed lines indicated the intermolecular C-S and C-C contacts between **6** and  $C_{60}$  in  $6 \cdot (C_{60})_2 \cdot (PhCl)_2$ , respectively. For molecule **B**, short contacts with PhCl molecules are observed: fourteen C-C contacts (3.20 to 3.38 Å). The hydrogen atoms are omitted for clarity.

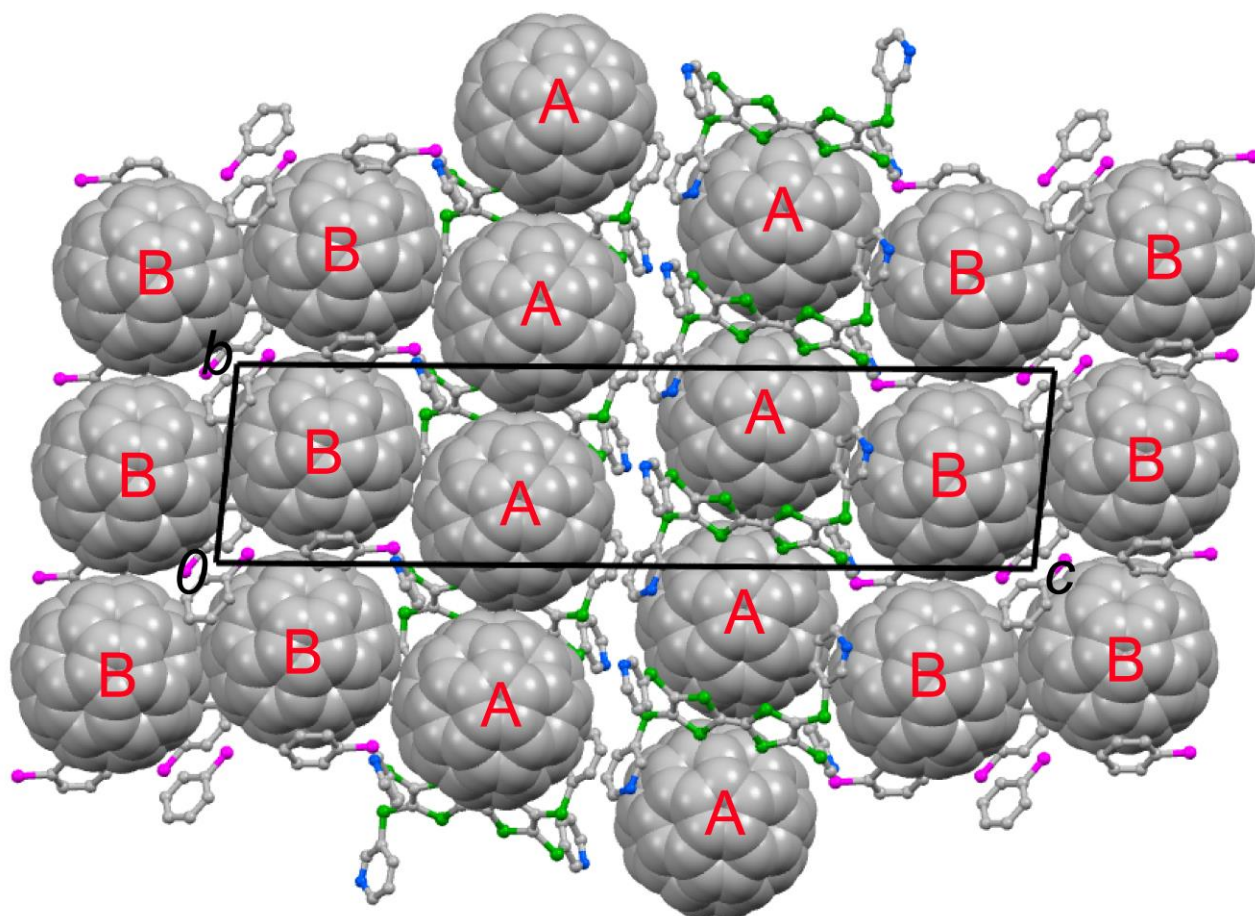

**Figure S26:** Crystal structure of  $6\bullet(\text{C}_{60})_2\bullet(\text{PhCl})_2$  projected along the crystallographic  $a$ -axis. The  $\text{C}_{60}$  molecules are drawn in spacefill style and the hydrogen atoms are omitted for clarity.

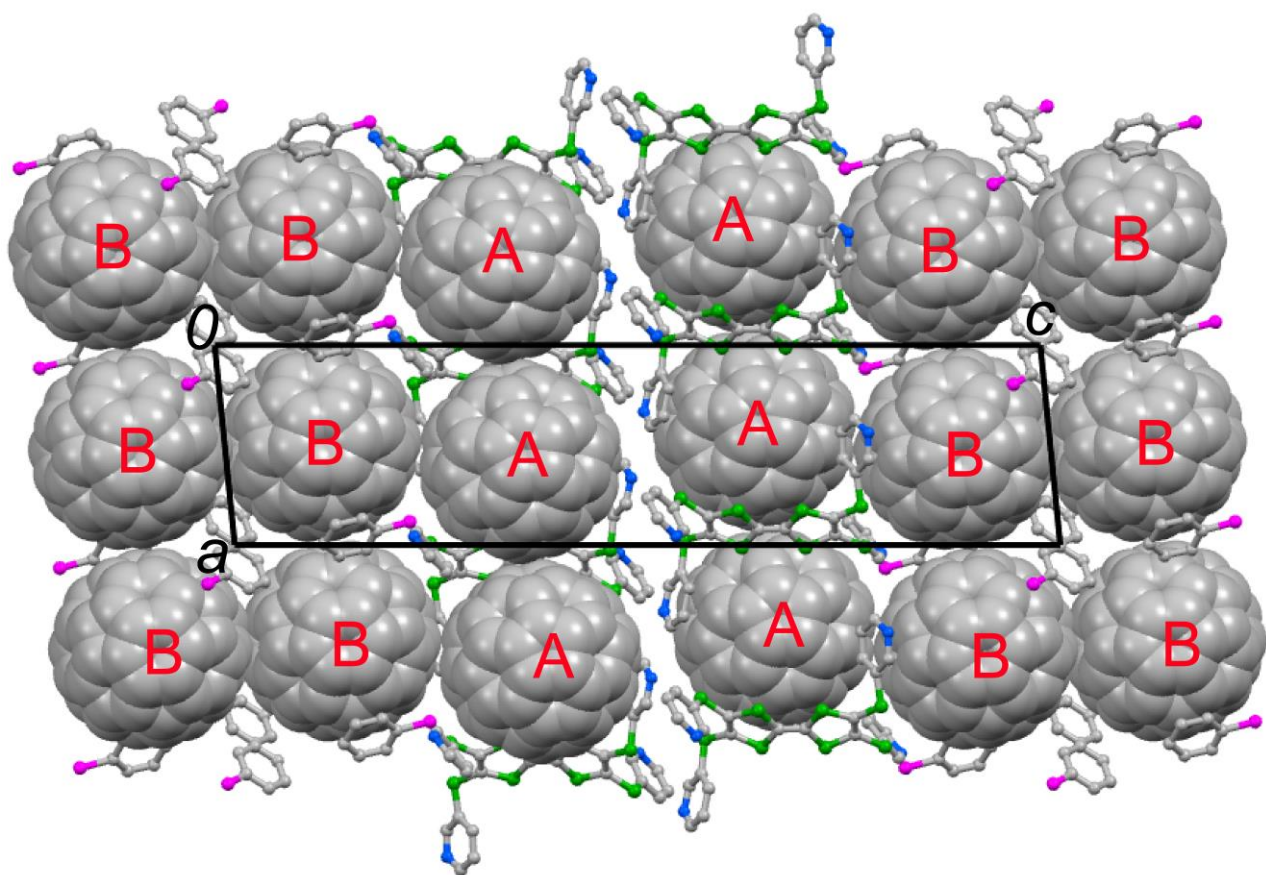

**Figure S27:** Crystal structure of  $6\bullet(\text{C}_{60})_2\bullet(\text{PhCl})_2$  projected along the crystallographic  $b$ -axis. The  $\text{C}_{60}$  molecules are drawn in spacefill style and the hydrogen atoms are omitted for clarity.



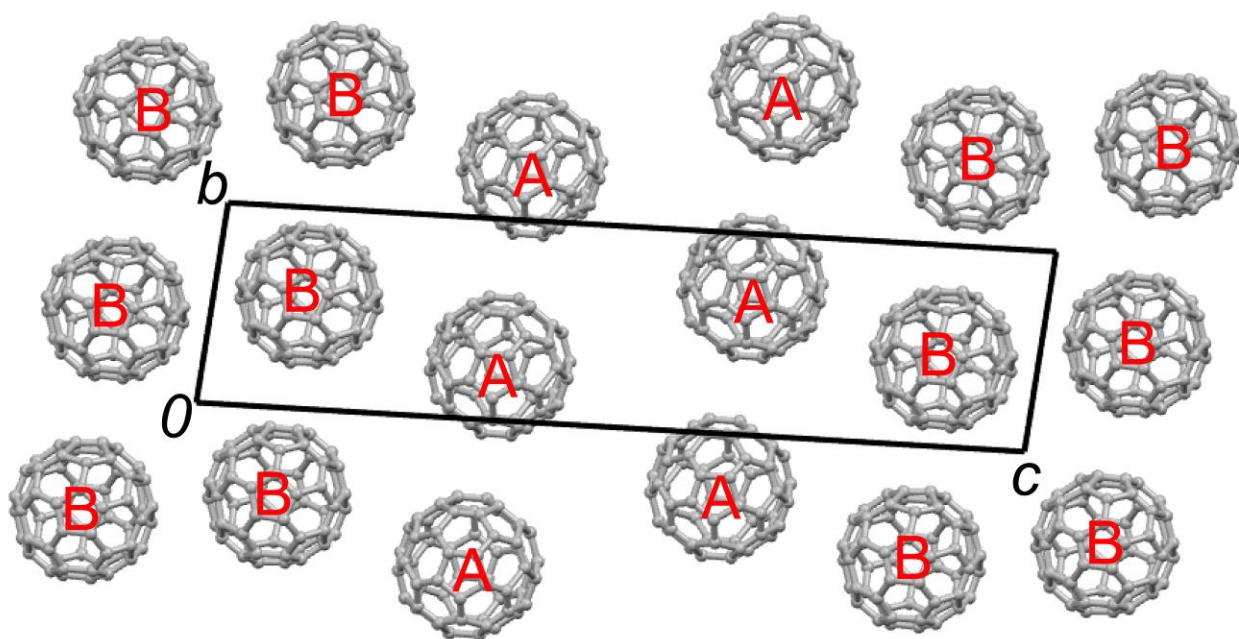

**Figure S28:** The  $C_{60}$  molecules arrange in the  $bc$ -plane in complex  $6 \bullet (C_{60})_2 \bullet (PhCl)_2$ .

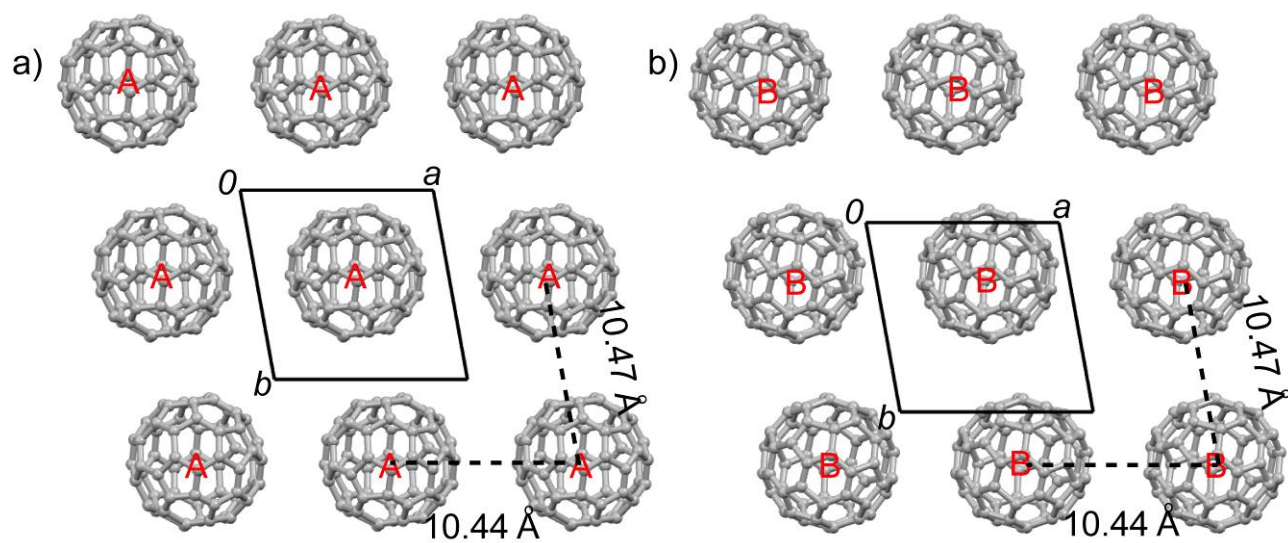

**Figure S29:** The  $C_{60}$  molecules arrange in the  $ab$ -plane in complex  $6 \bullet (C_{60})_2 \bullet (PhCl)_2$ . a) The **A** on the  $ab$ -plane; b) the **B** on the  $ab$ -plane.

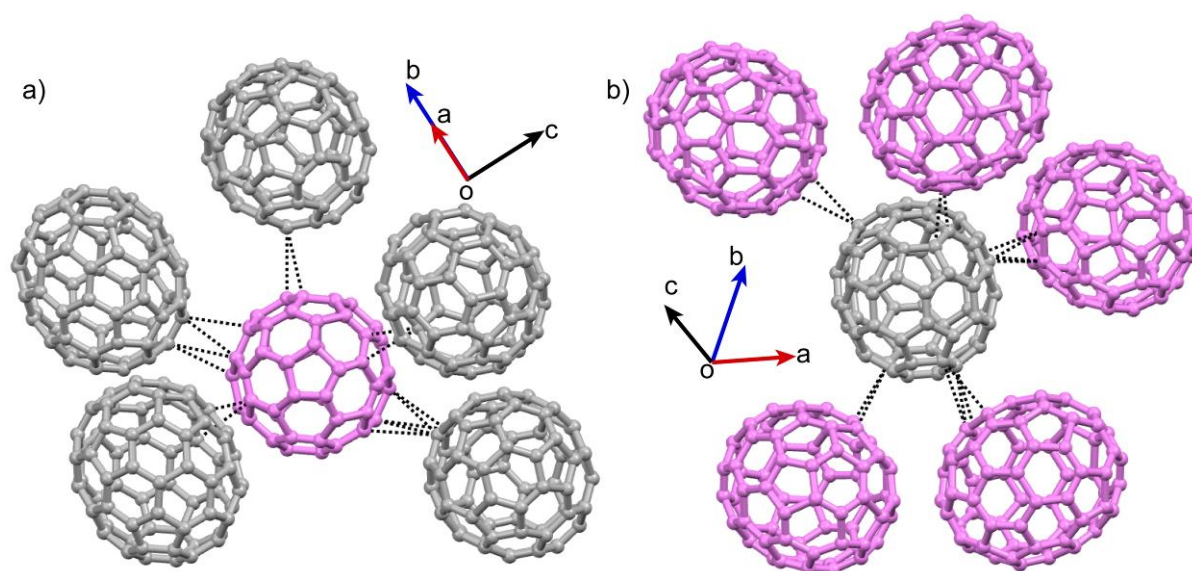

**Figure S30:** The  $C_{70}$  molecules are arranged as three-dimensional network structure in  $2 \cdot (C_{70})_4 \cdot (PhCl)_2$ . In order to explained that, we put **A** and **B** (violet and grey, respectively) in the core and discuss the arrangement of **B** and **A**, respectively. The adjacent  $C_{70}$  molecules are distributed as slant four cones. a) the C–C contacts between core **A** and adjacent **B** are range from 3.20 to 3.38 Å; b) the distances of contacts between core **B** and adjacent **A** are same as a).



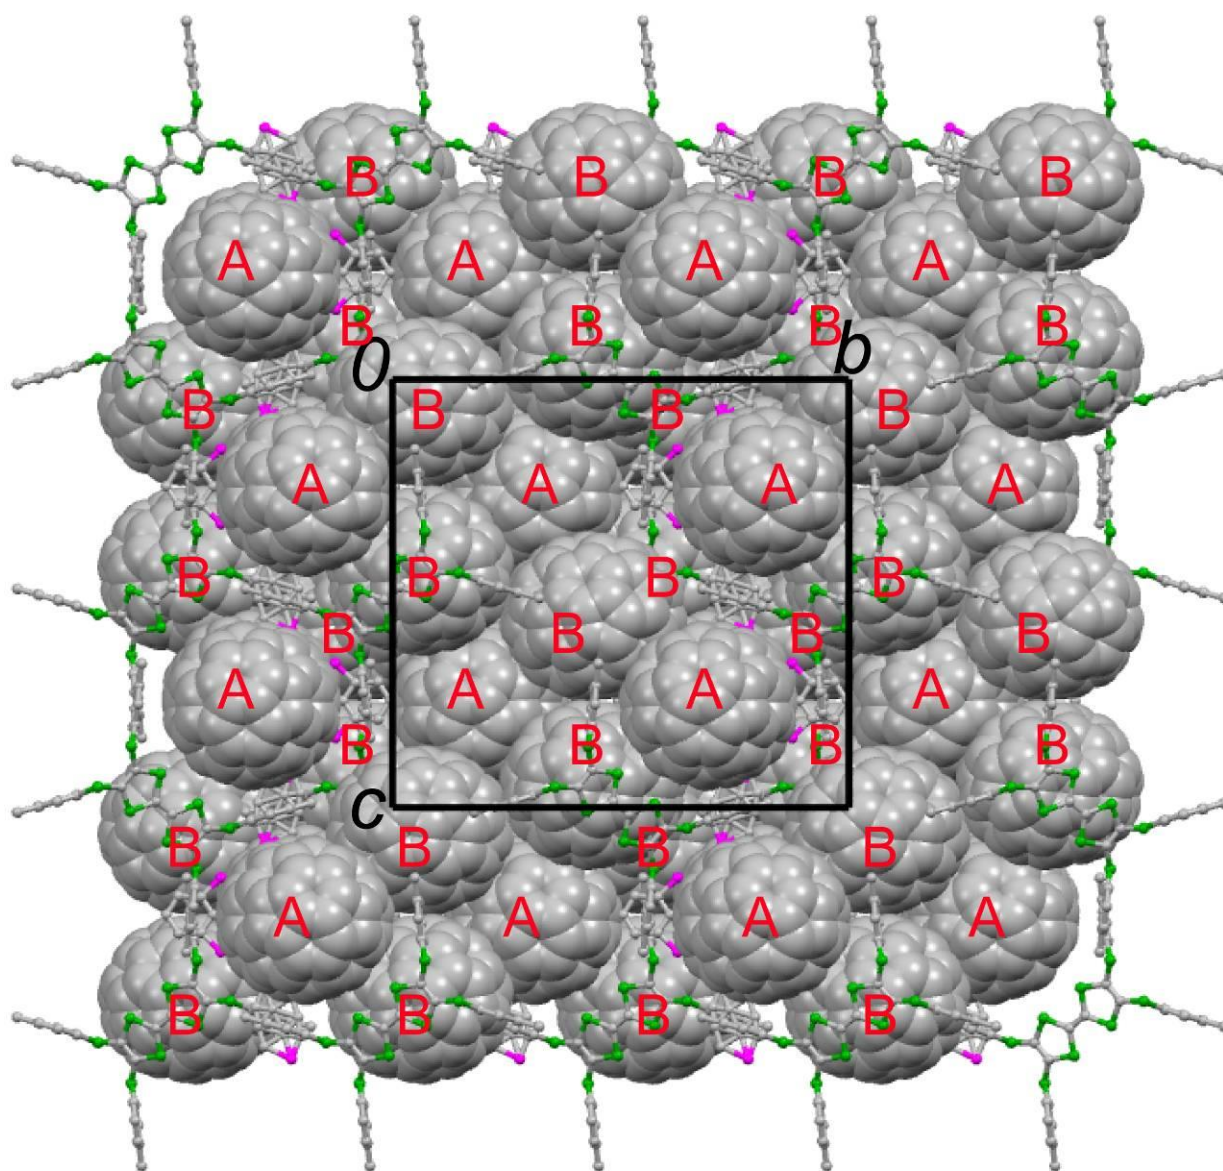

**Figure S31:** Crystal structure of  $2 \cdot (C_{70})_4 \cdot (PhCl)_2$  projected along the crystallographic  $a$ -axis. The  $C_{70}$  molecules are drawn in spacefill style and the hydrogen atoms are omitted for clarity.

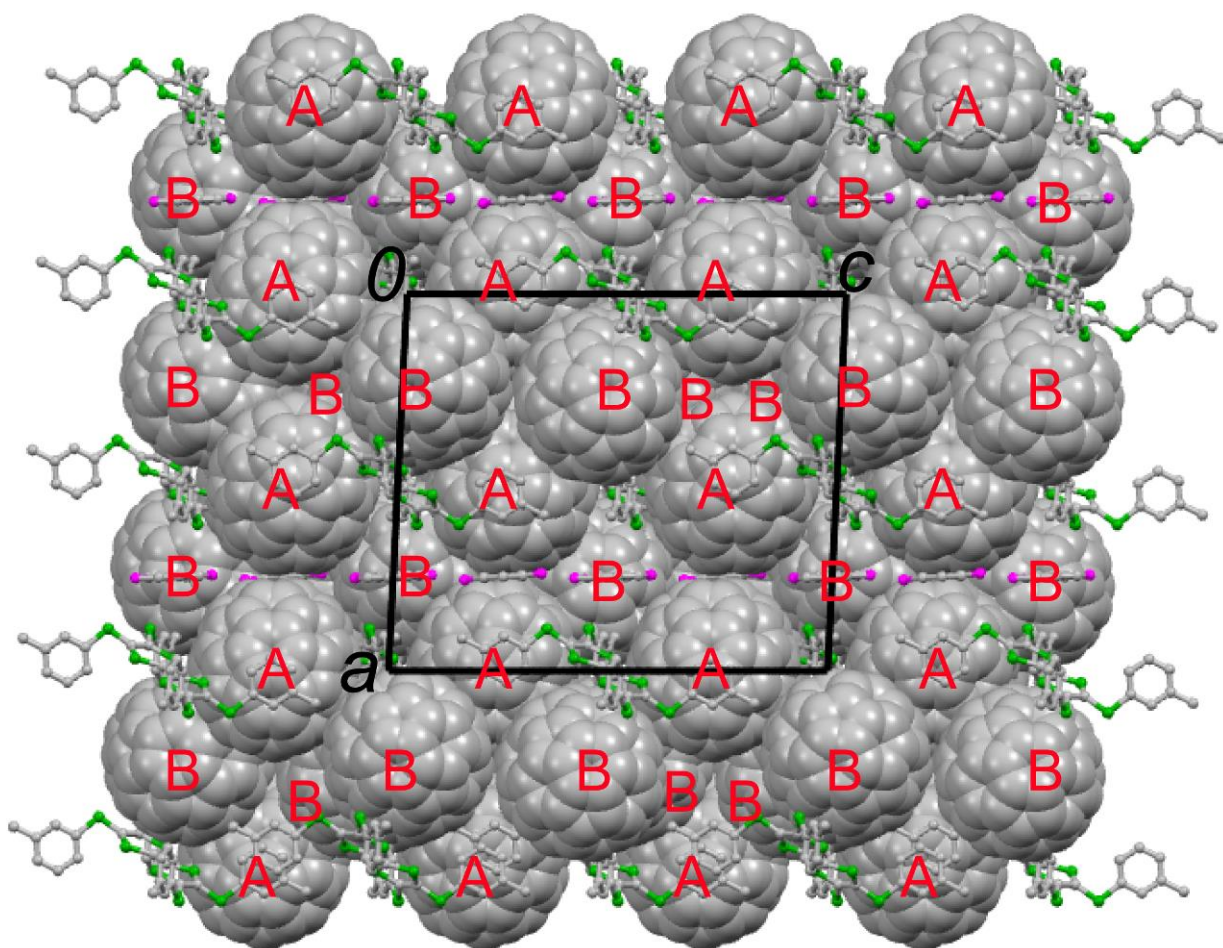

**Figure S32:** Crystal structure of  $2 \cdot (C_{70})_4 \cdot (PhCl)_2$  projected along the crystallographic  $b$ -axis. The  $C_{70}$  molecules are drawn in spacefill style and the hydrogen atoms are omitted for clarity.

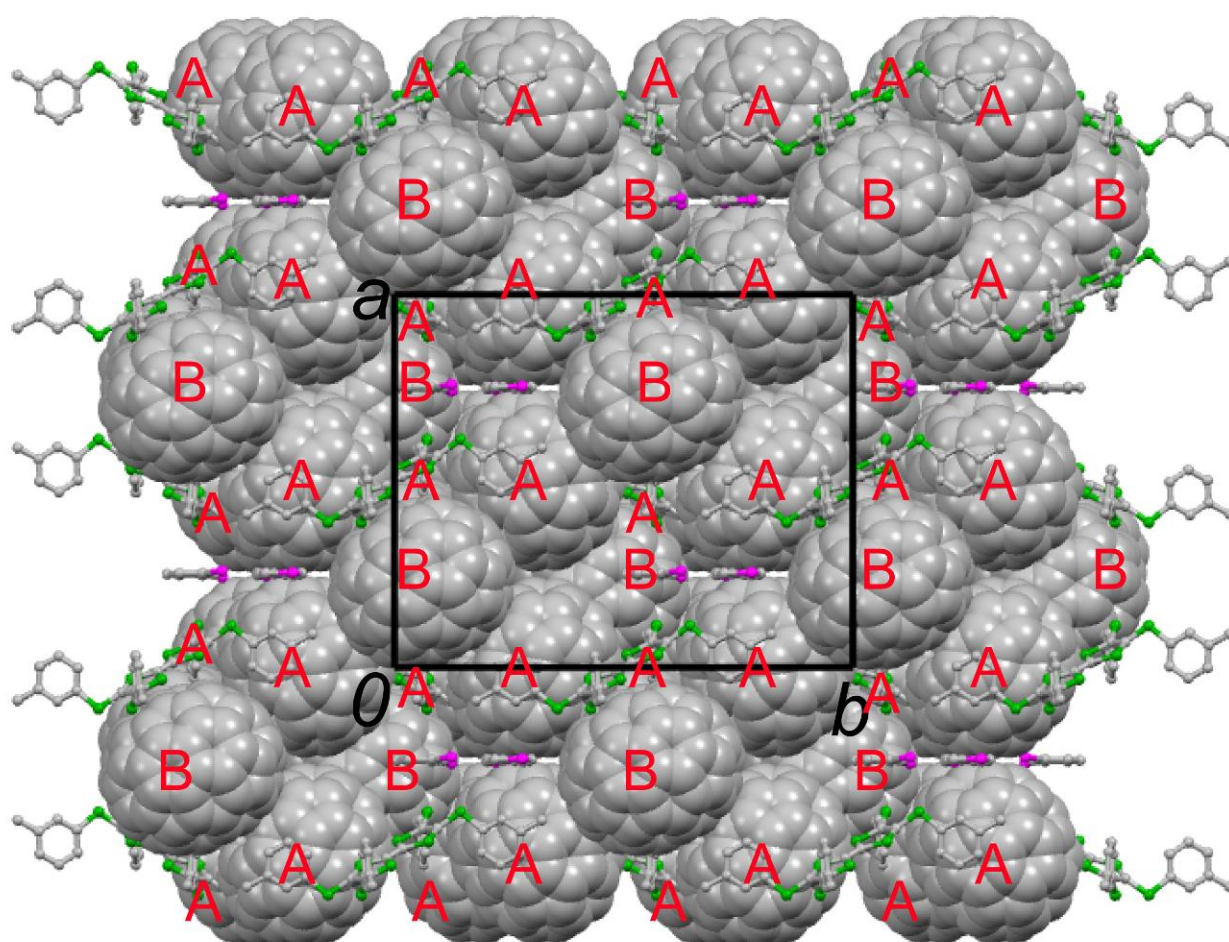

**Figure S33:** Crystal structure of  $2 \cdot (\text{C}_{70})_4 \cdot (\text{PhCl})_2$  projected along the crystallographic *c*-axis. The C<sub>70</sub> molecules are drawn in spacefill style and the hydrogen atoms are omitted for clarity.



## IR Spectra

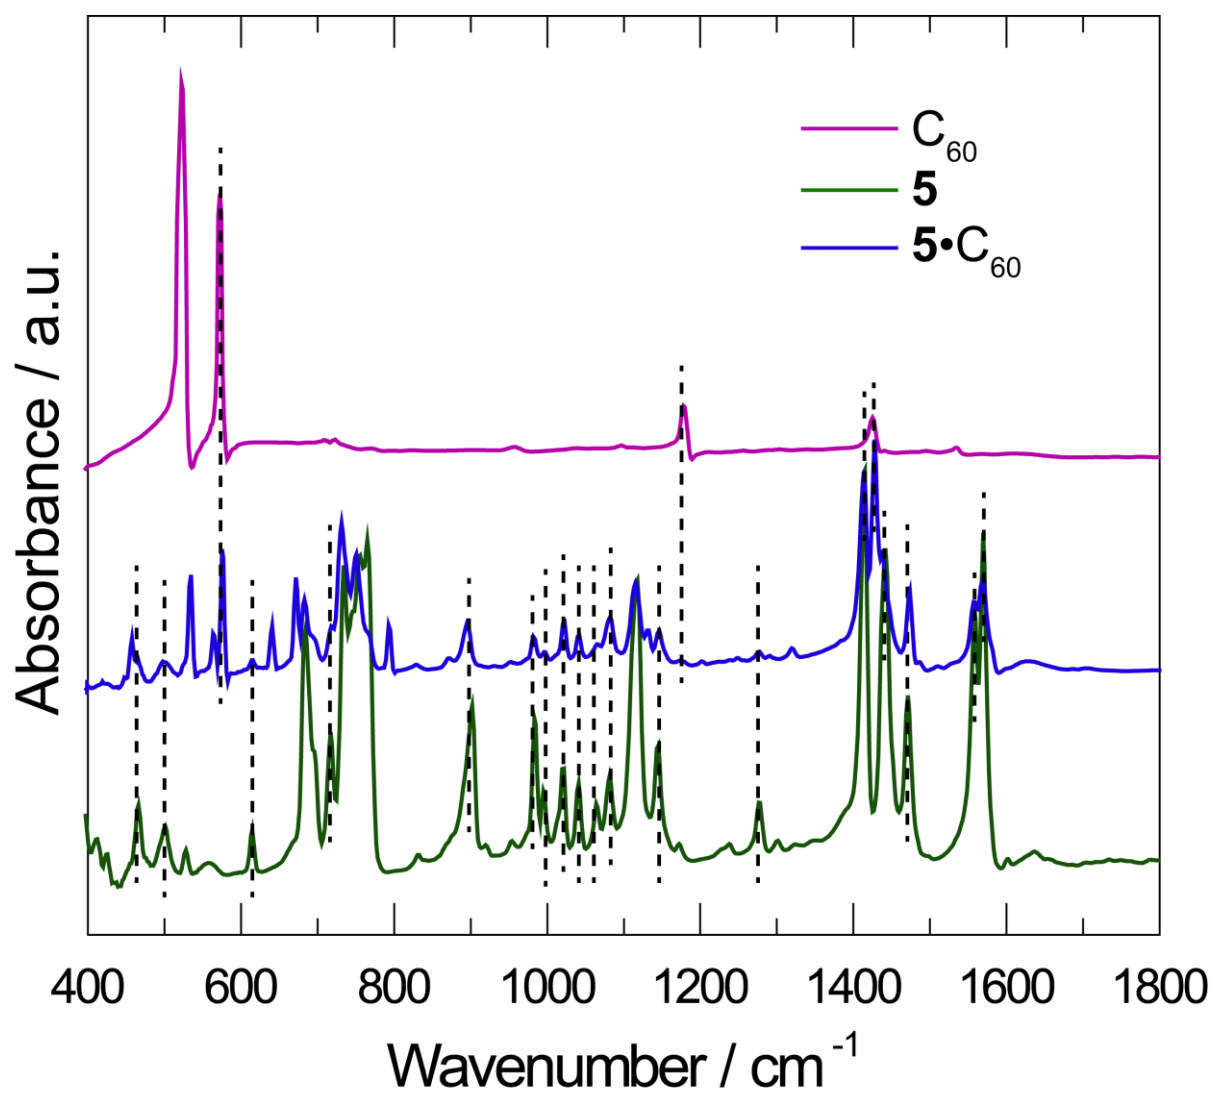

**Figure S34:** IR spectra of **5•C<sub>70</sub>** along with those of **5** and **C<sub>70</sub>** for comparison (in KBr). The black dashed lines are guides for the eye.

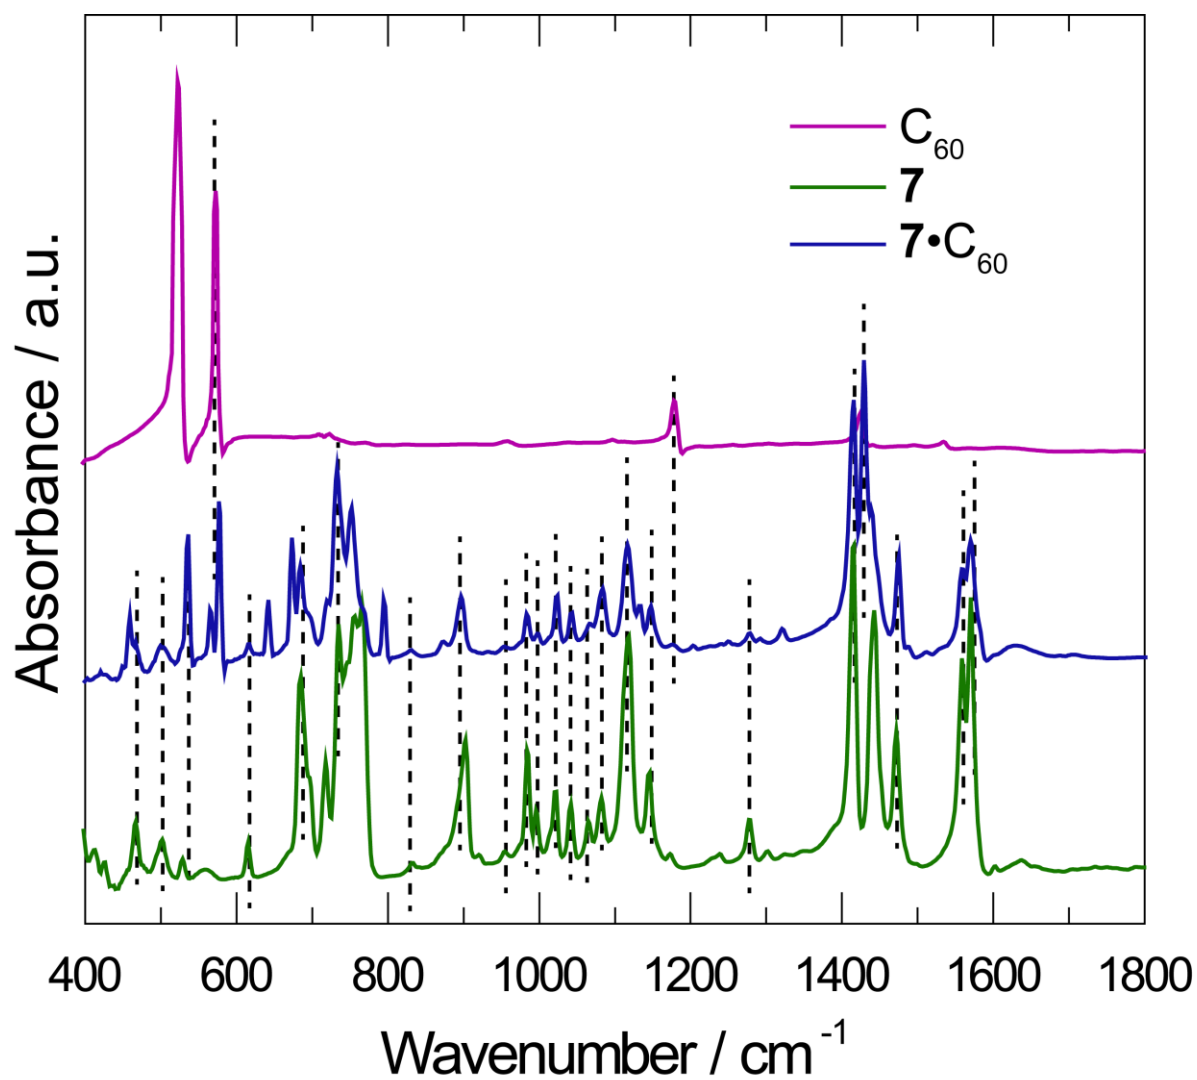

**Figure S35:** IR spectra of  $7 \cdot \text{C}_{60}$  along with those of **7** and  $\text{C}_{60}$  for comparison (in KBr). The black dashed lines are guides for the eye.

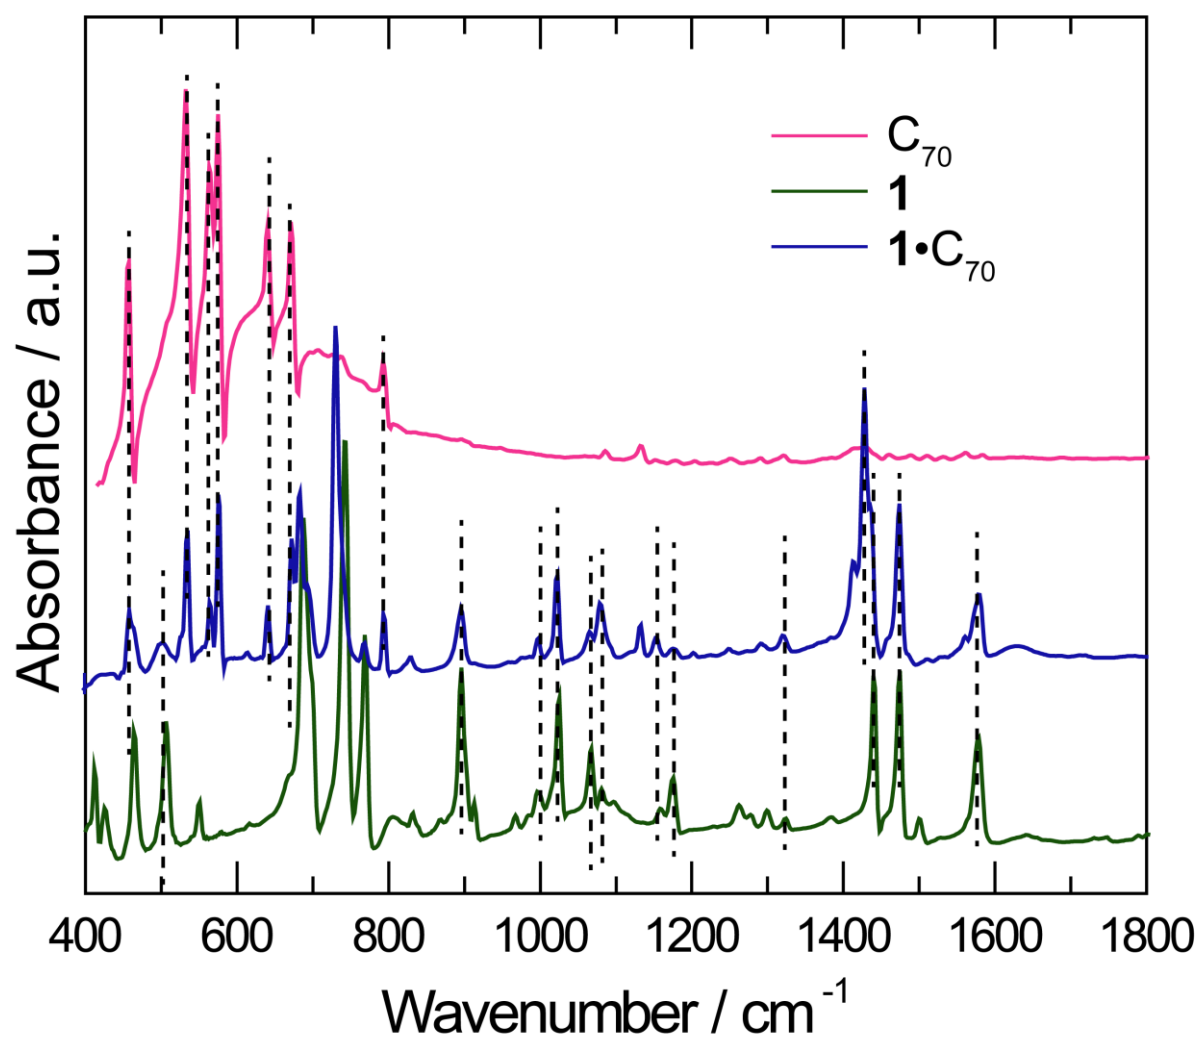

**Figure S36:** IR spectra of **1**• $\text{C}_{70}$  along with those of **1** and  $\text{C}_{70}$  for comparison (in KBr). The black dashed lines are guides for the eye.

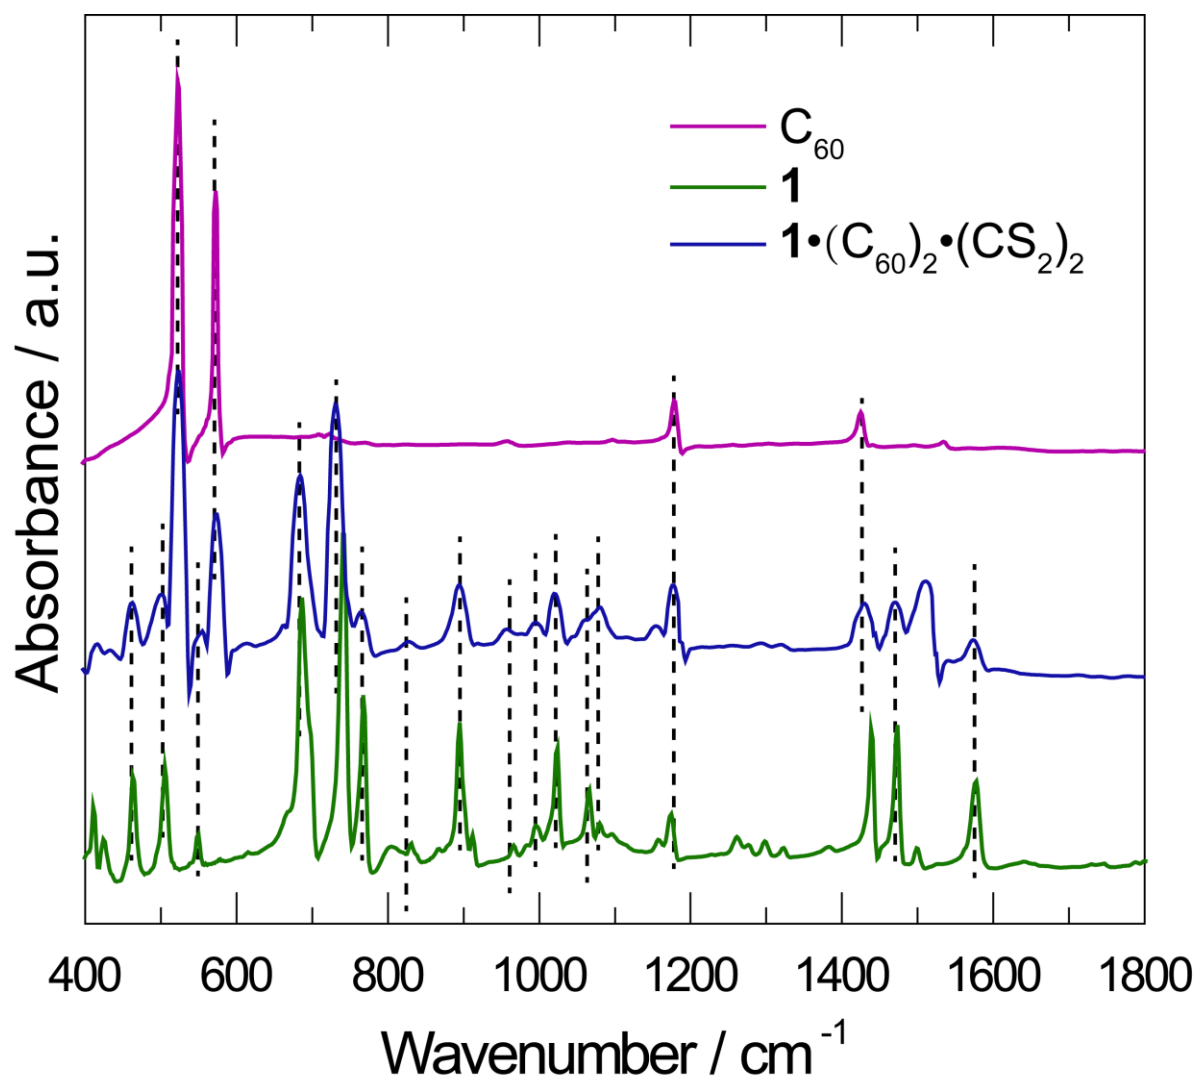

**Figure S37:** IR spectra of **1**·(C<sub>60</sub>)<sub>2</sub>·(CS<sub>2</sub>)<sub>2</sub> along with those of **1** and C<sub>60</sub> for comparison (in KBr). The black dashed lines are guides for the eye.

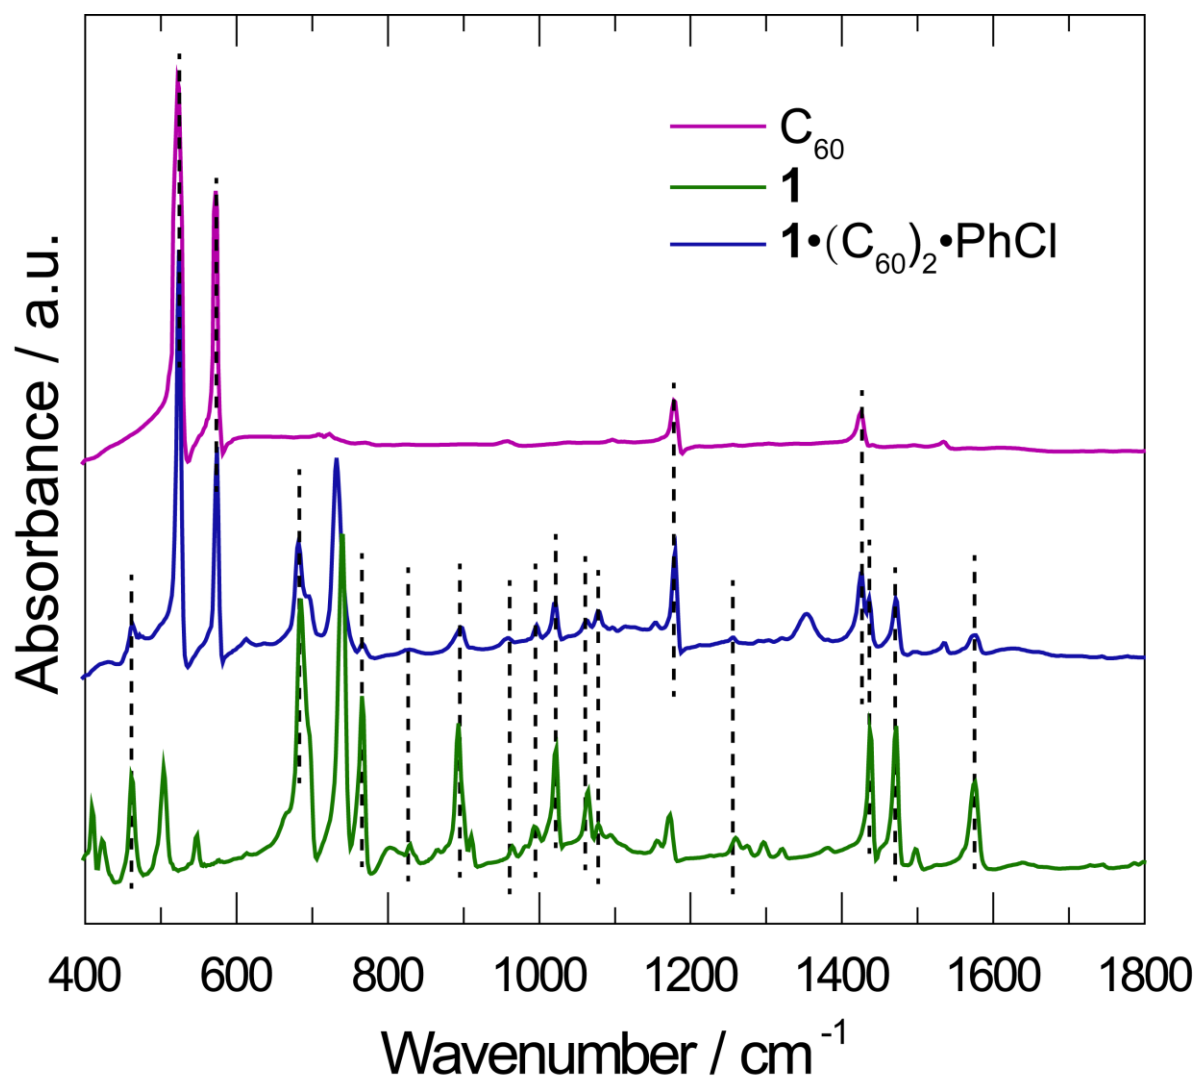

**Figure S38:** IR spectra of  $\text{1} \cdot (\text{C}_{60})_2 \cdot \text{PhCl}$  along with those of **1** and  $\text{C}_{60}$  for comparison (in KBr). The black dashed lines are guides for the eye.



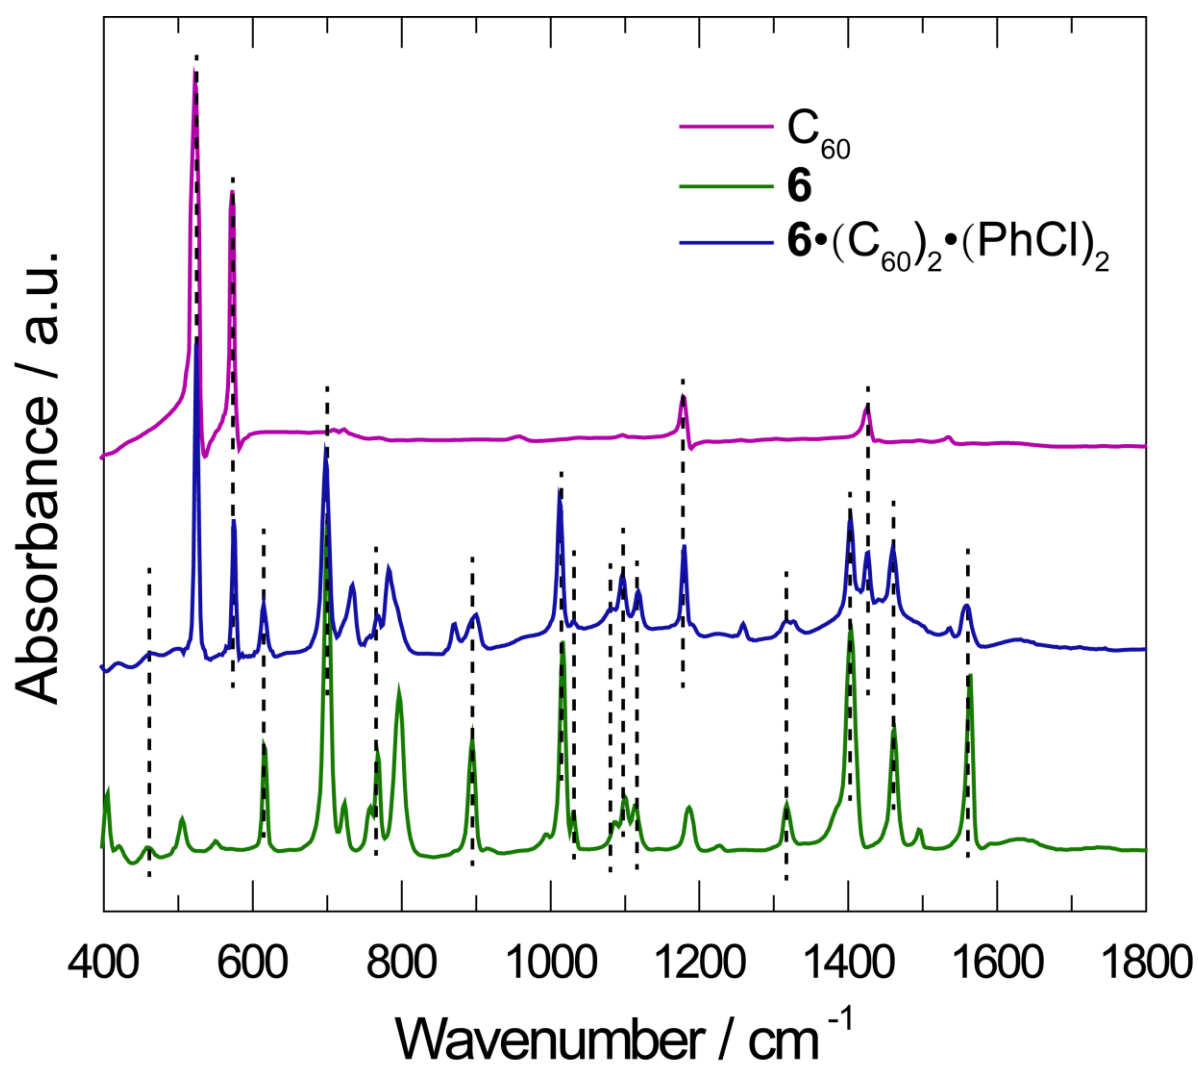

**Figure S39:** IR spectra of **6**•(C<sub>60</sub>)<sub>2</sub>•(PhCl)<sub>2</sub> along with those of **6** and C<sub>60</sub> for comparison (in KBr). The black dashed lines are guides for the eye.

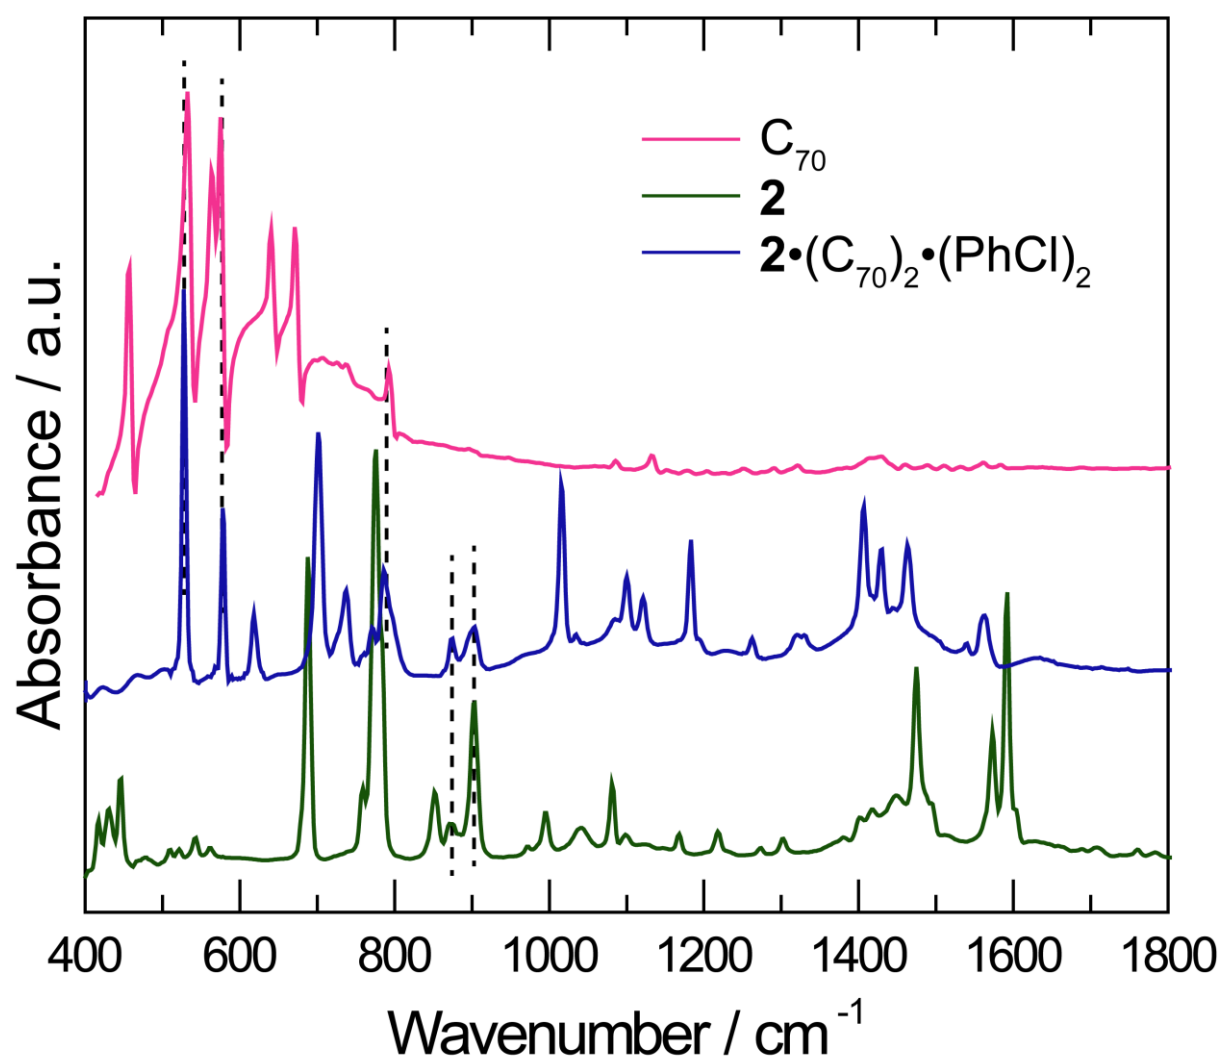

**Figure S40:** IR spectra of **2**•(C<sub>70</sub>)<sub>4</sub>•(PhCl)<sub>2</sub> along with those of **2** and C<sub>70</sub> for comparison (in KBr). The black dashed lines are guides for the eye.

## X-ray powder diffraction (PXRD)

To insure the bulk samples having the same phase with the single crystals, the powder X-ray diffraction analysis (PXRD) of the co-crystals were performed. The observed PXRD patterns are almost identical to the corresponding PXRD calculated from the single crystal structure analysis, thus the bulky samples have the same phase as the corresponding single crystals. The subtle differences would be ascribable to the measurement temperatures: the PXRD measurement was performed at room temperature, whereas most of the single crystal diffraction was performed at temperature lower than 150 K.

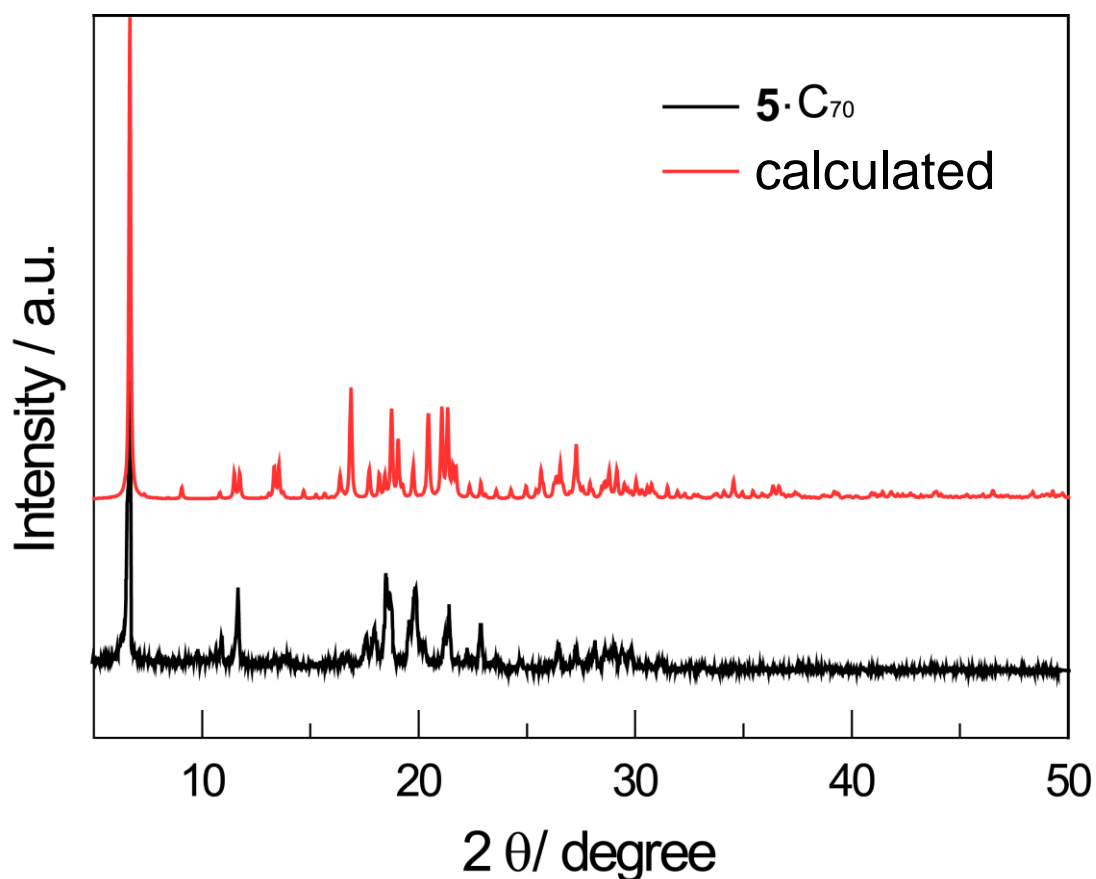

**Figure S41:** Experimental (black line) and calculated (red line) PXRD patterns for  $5 \cdot C_{70}$ .

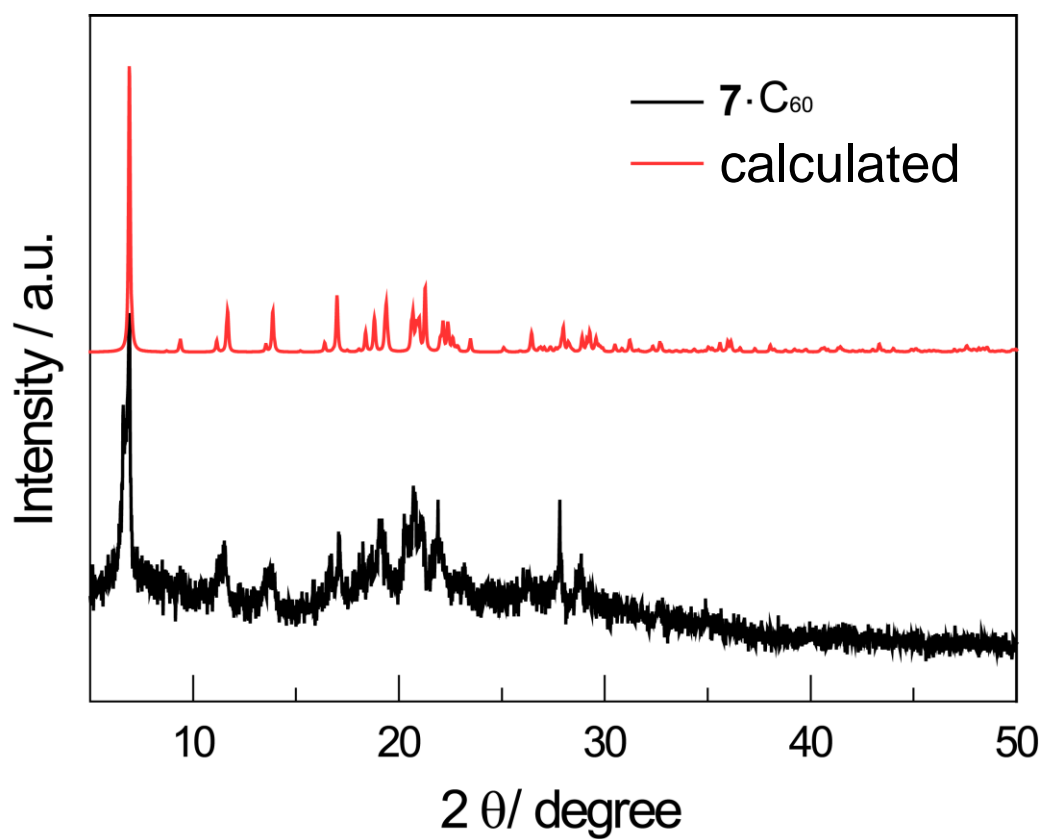

**Figure S42:** Experimental (black line) and calculated (red line) PXRD patterns for **7·C<sub>60</sub>**.

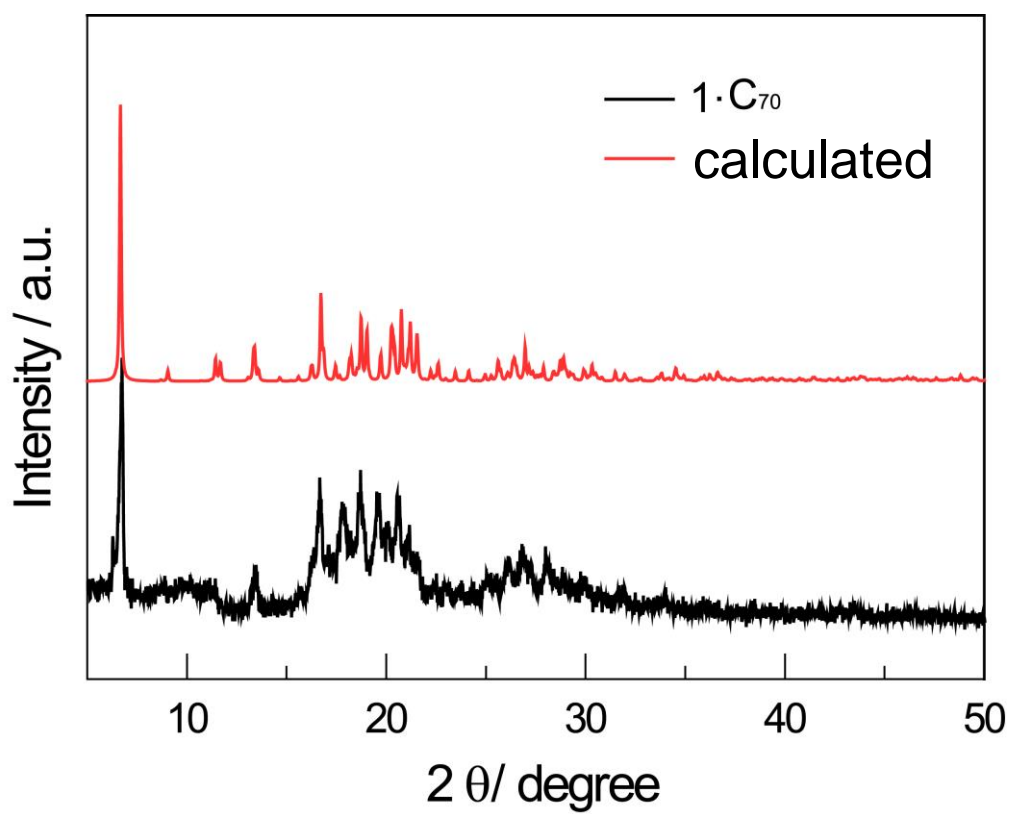

**Figure S43:** Experimental (black line) and calculated (red line) PXRD patterns for **1·C<sub>70</sub>**.

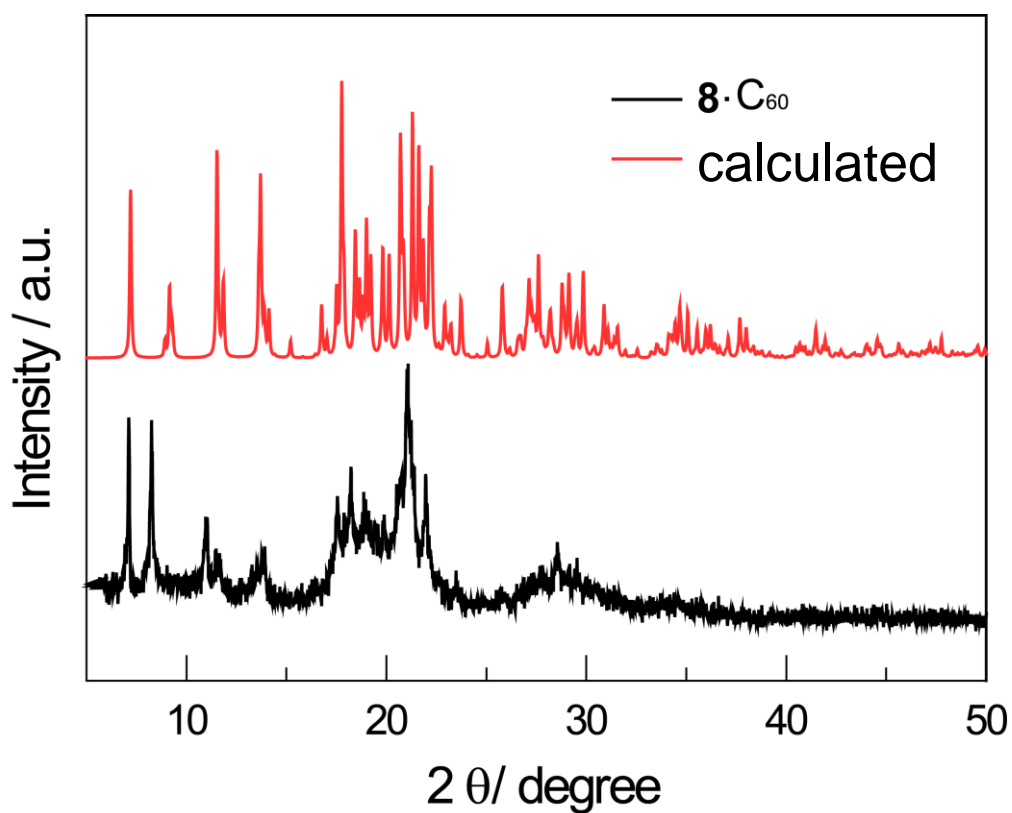

**Figure S44:** Experimental (black line) and calculated (red line) PXRD patterns for  $8 \cdot C_{60}$ .

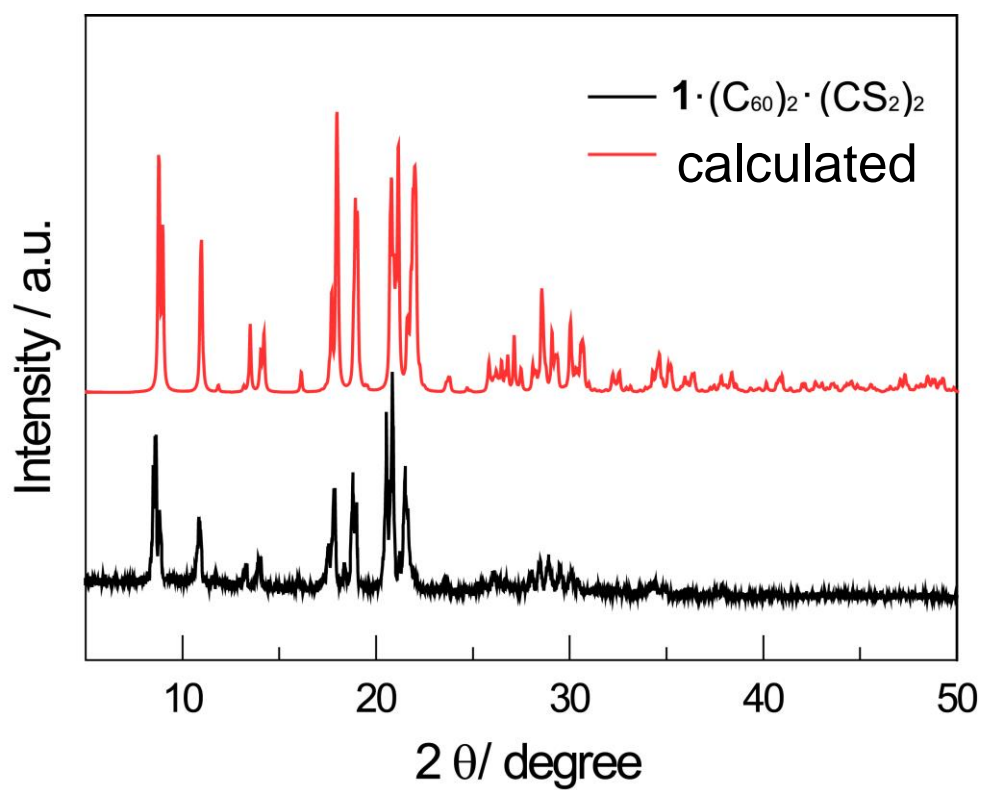

**Figure S45:** Experimental (black line) and calculated (red line) PXRD patterns for  $1 \cdot (C_{60})_2 \cdot (CS_2)_2$ .



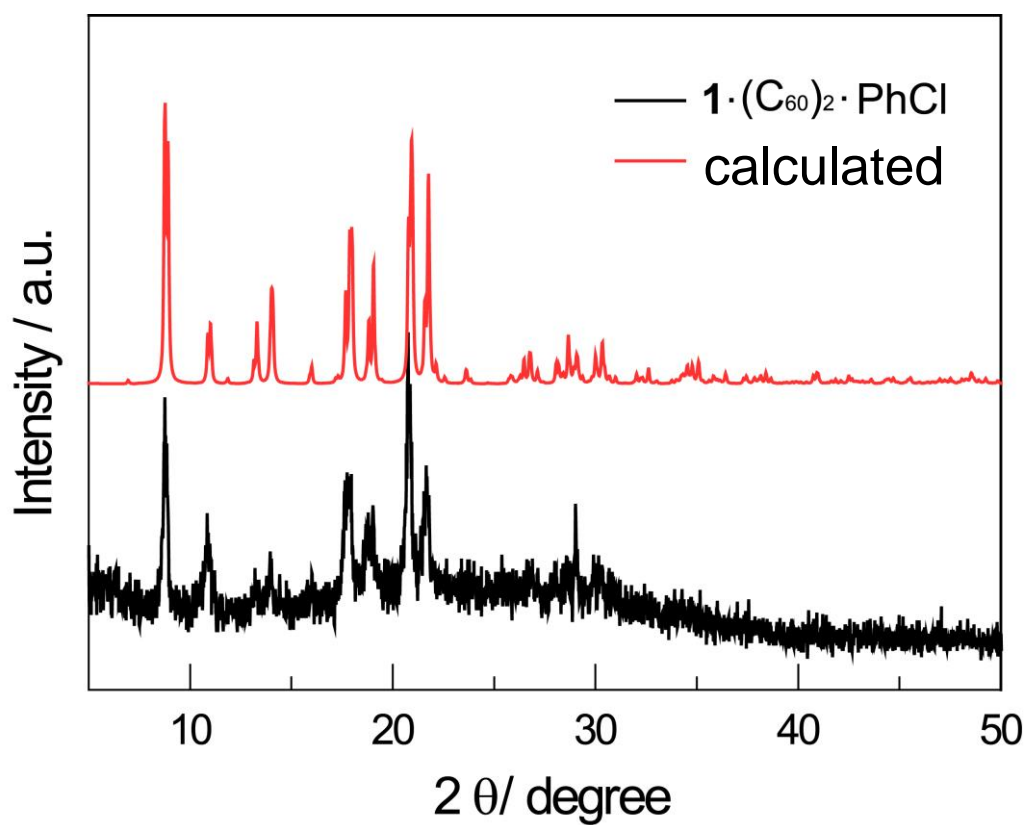

**Figure S46:** Experimental (black line) and calculated (red line) PXRD patterns for  $1 \cdot (C_{60})_2 \cdot PhCl$ .

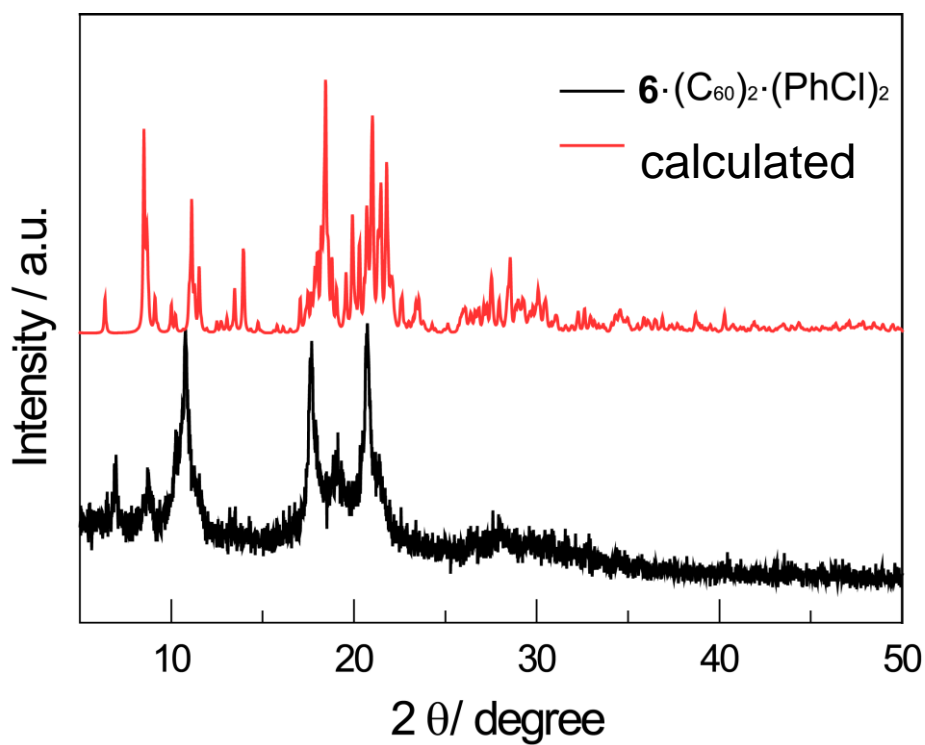

**Figure S47:** Experimental (black line) and calculated (red line) PXRD patterns for  $6 \cdot (C_{60})_2 \cdot (PhCl)_2$ .

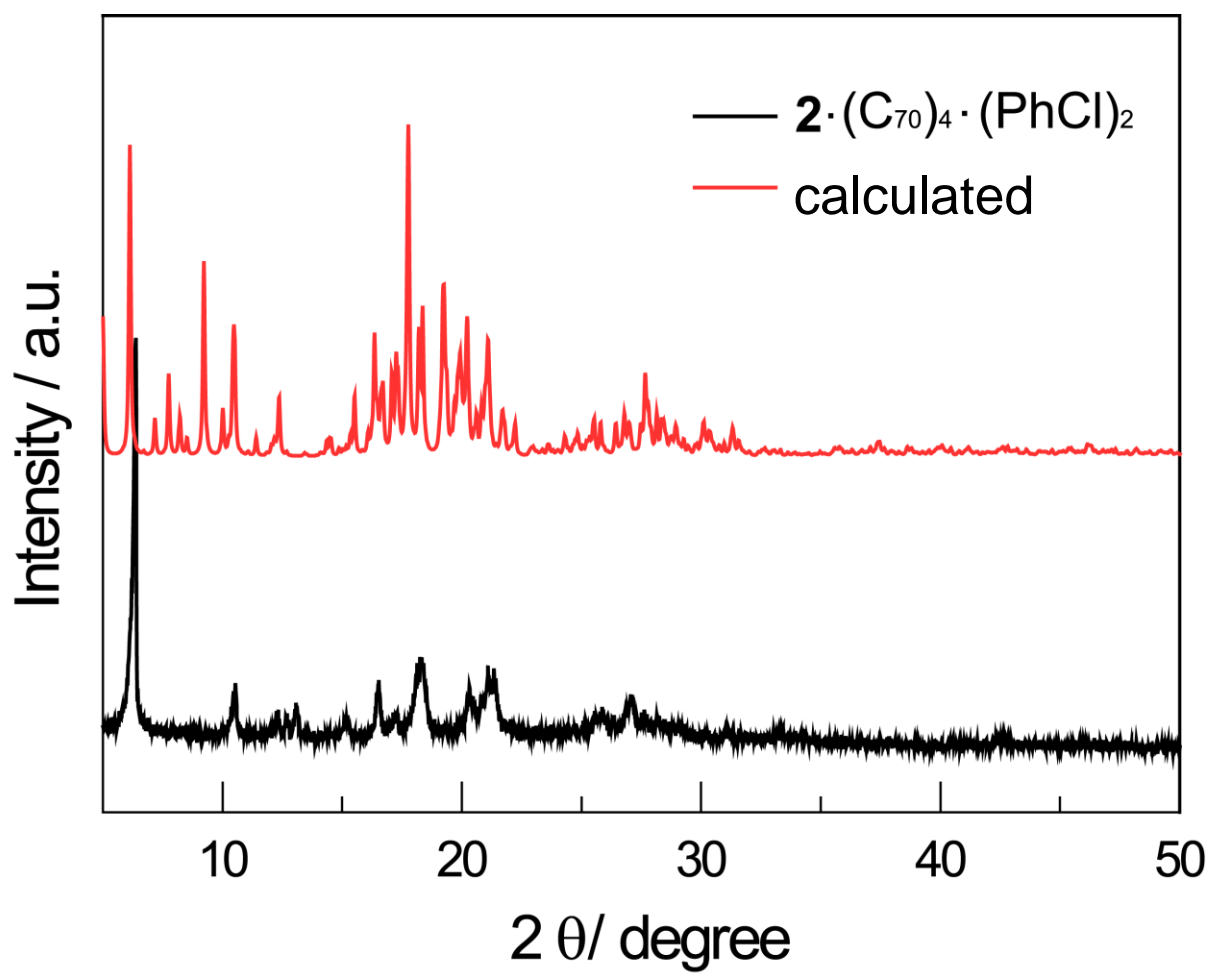

**Figure S48:** Experimental and calculated PXRD patterns for  $2 \cdot (C_{60})_4 \cdot (PhCl)_2$ .

## Thermogravimetric analyses (TGA)

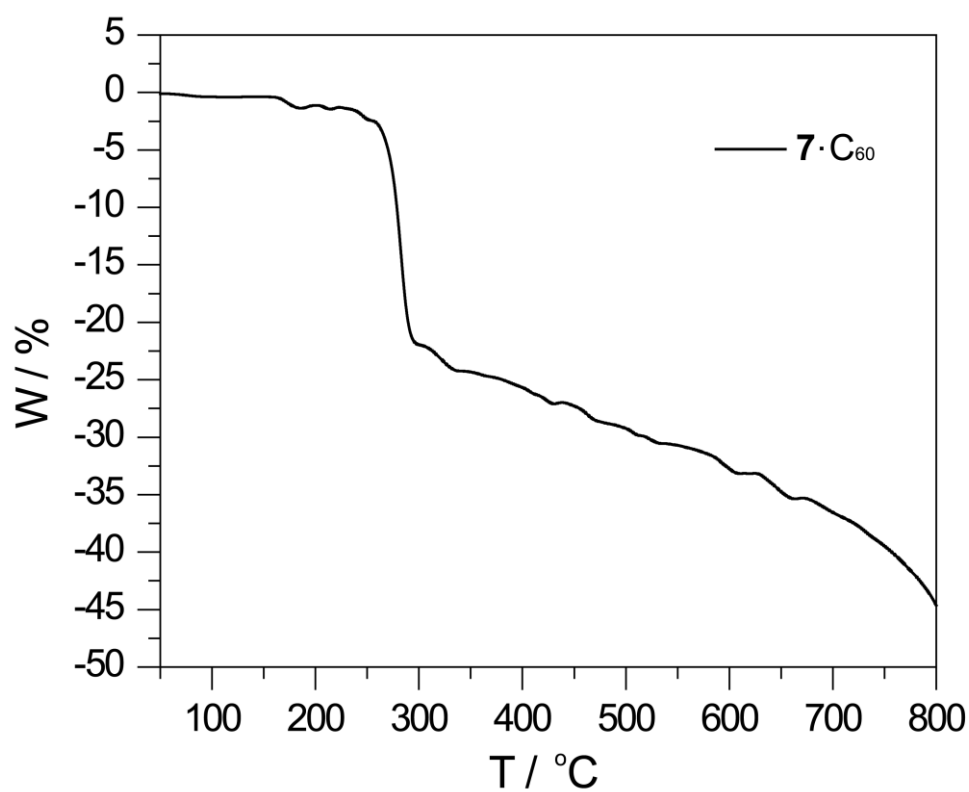

Figure S48: TGA graph of  $7 \cdot C_{60}$ .

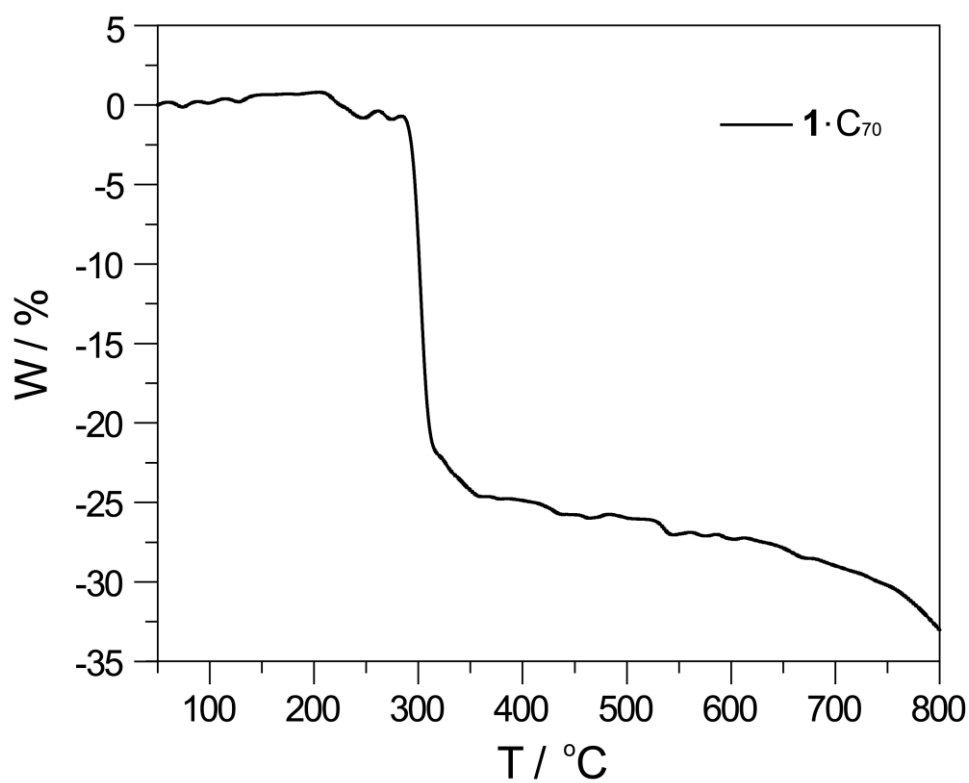

Figure S49: TGA graph of  $1 \cdot C_{60}$ .

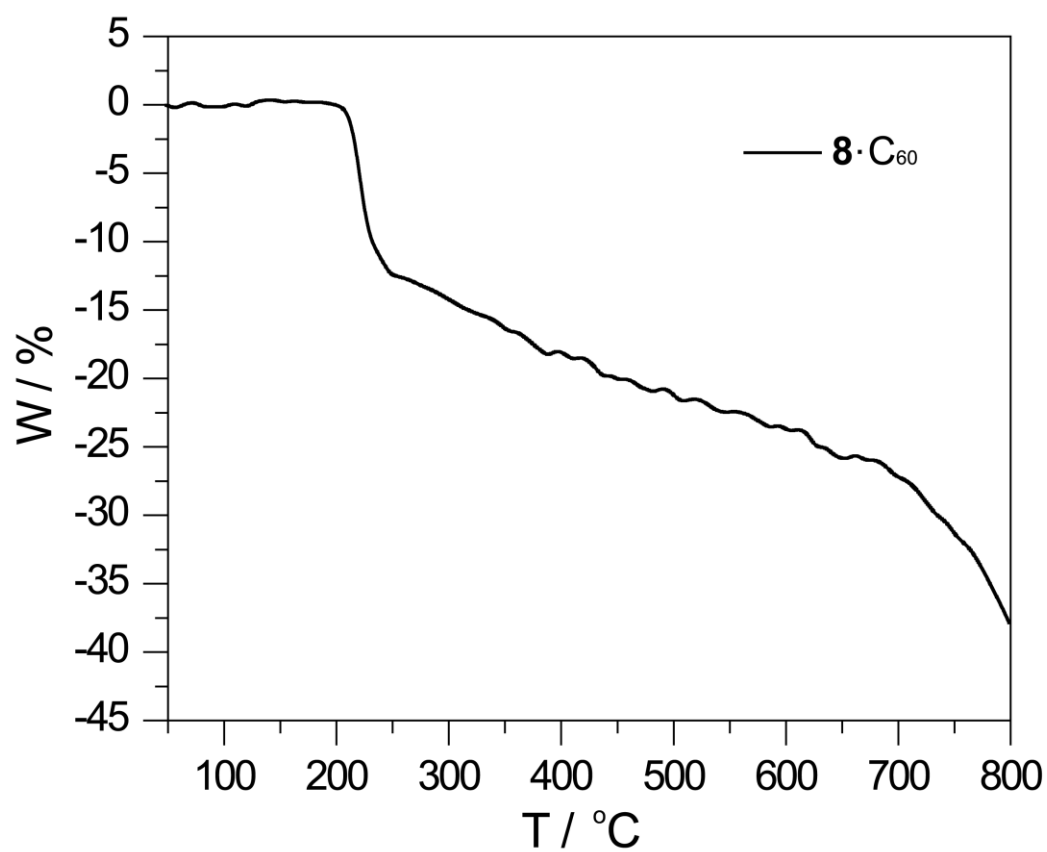

**Figure S50:** TGA graph of complex  $8 \cdot C_{60}$ .

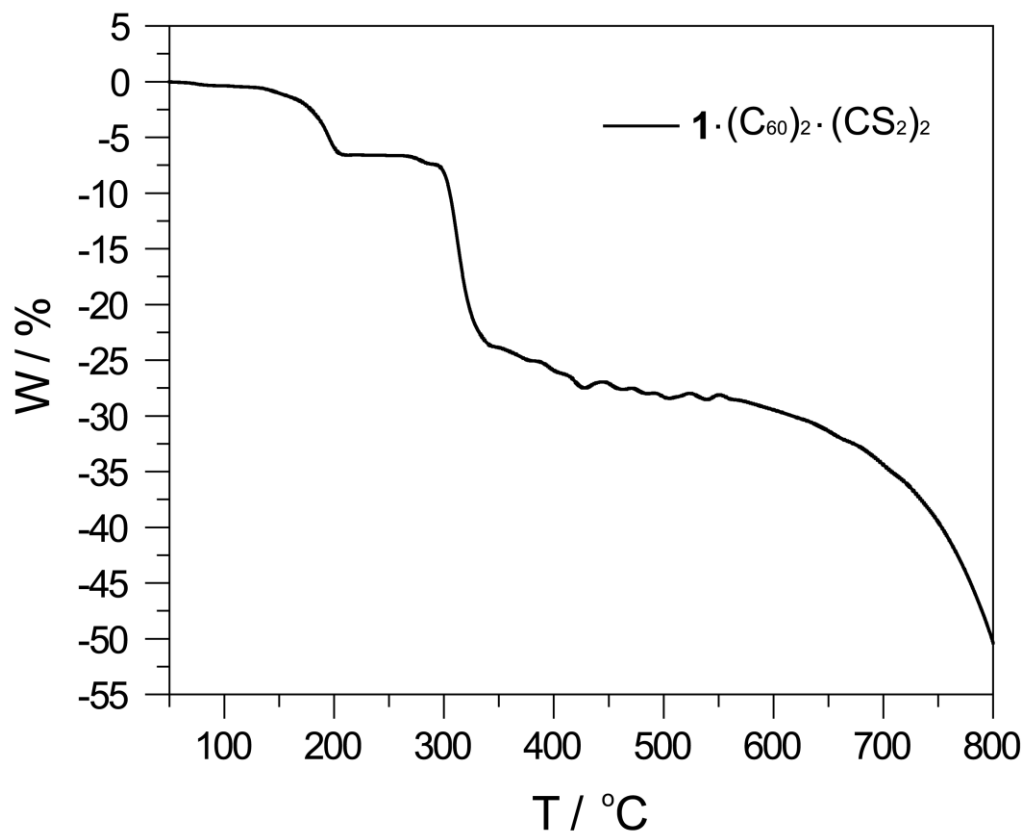

**Figure S51:** TGA graph of complex  $1 \cdot (C_{60})_2 \cdot (CS_2)_2$ .

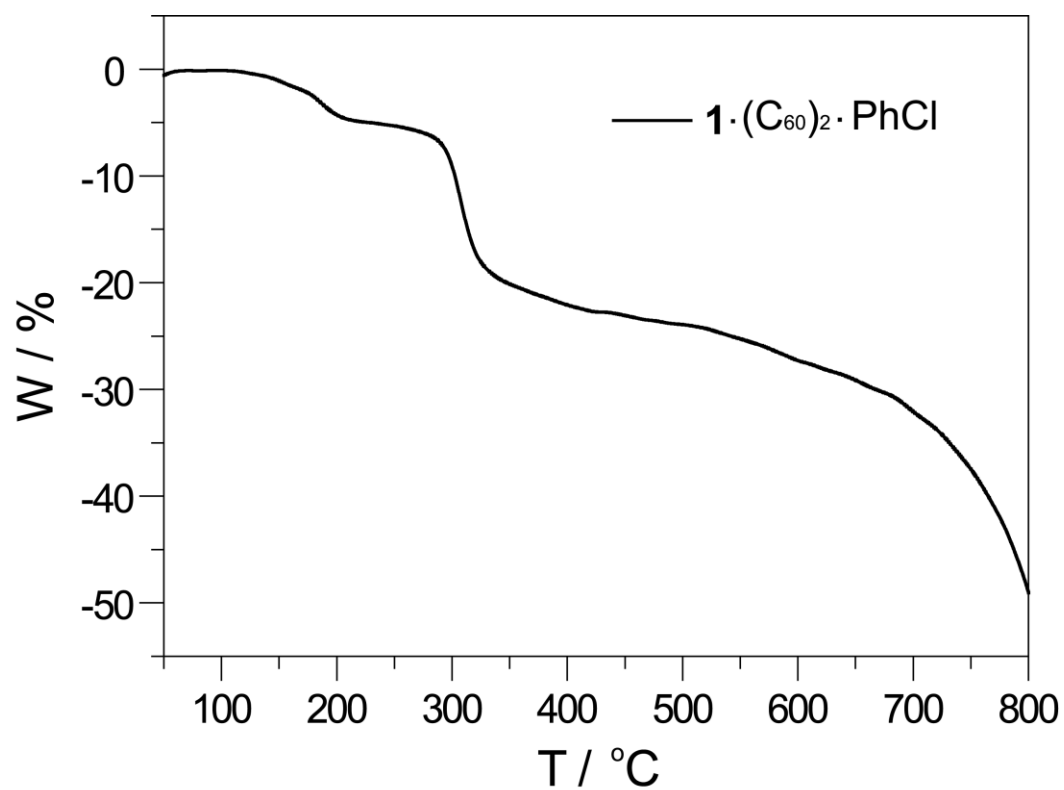

**Figure S52:** TGA graph of complex  $1 \cdot (C_{60})_2 \cdot PhCl$ .

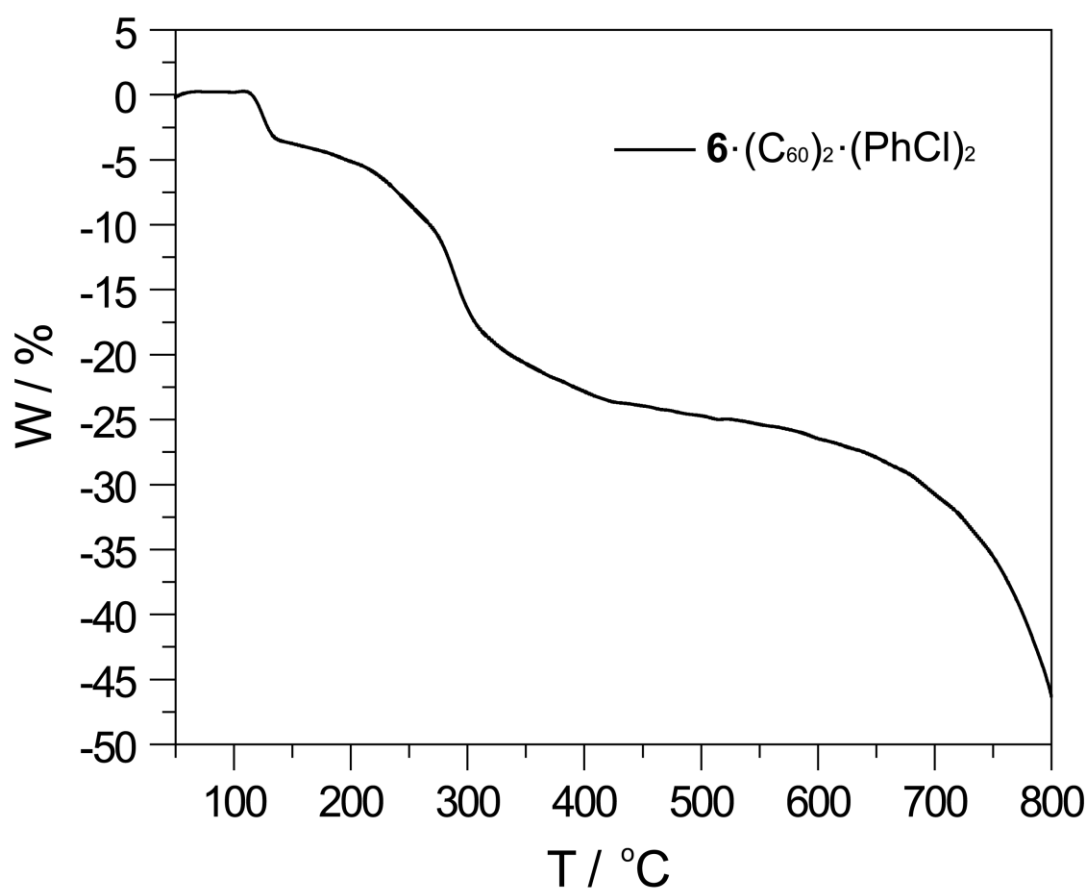

**Figure S53:** TGA graph of complex  $6 \cdot (C_{60})_2 \cdot (PhCl)_2$ .



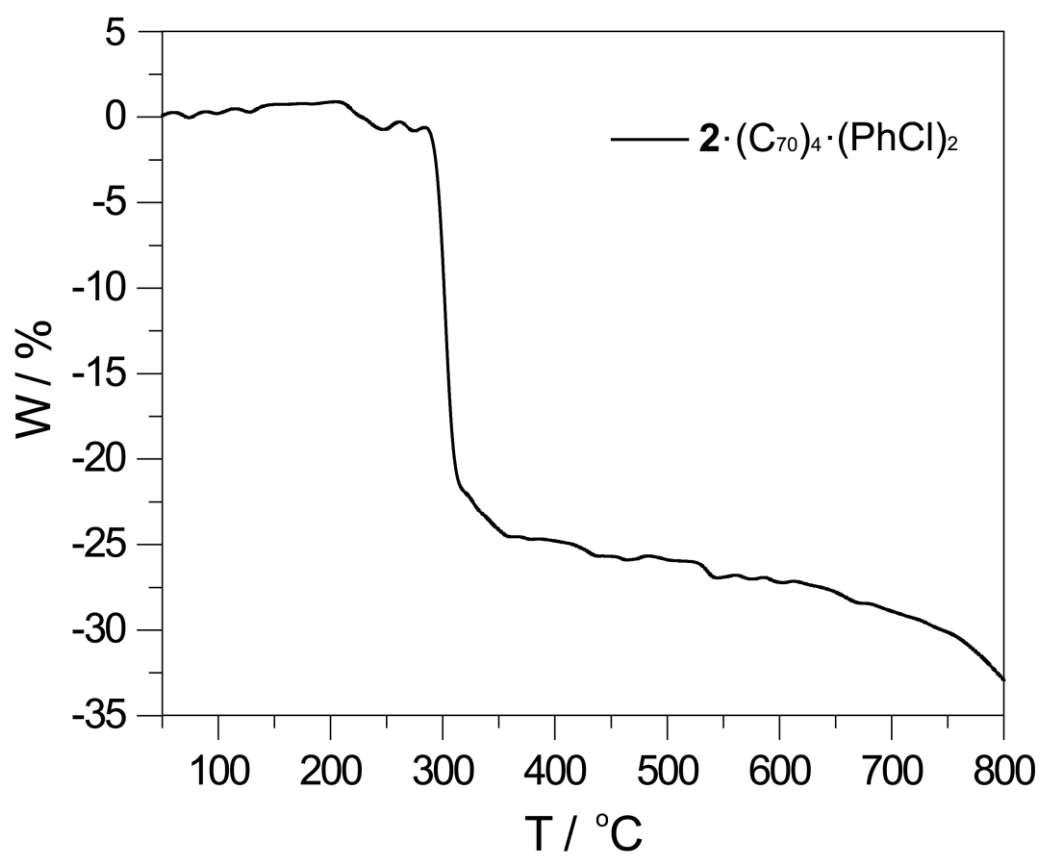

**Figure S54:** TGA graph of complex  $2 \cdot (C_{60})_4 \cdot (PhCl)_2$ .
